# Supplementary material for: Normal distribution of H3K9me3 occupancy co-mediated by histone methyltransferase BcDIM5 and histone deacetylase BcHda1 maintains stable ABA synthesis in Botrytis cinerea TB-31
Source: Front Microbiol. 2024 Mar 4;15:1339576. doi: 10.3389/fmicb.2024.1339576 (PMC10944950; doi:10.3389/fmicb.2024.1339576)
Supplement: Supplementary file 2 [file Table_2.XLSX]

## Sheet: Table S2.1
Table S2.1.1 Genes involved in sugar transporters and permeases were identified in B.cinerea TB-31 and ΔBcdim5.
B.cinerea B05.10 Gene ID		Protein name	Annotation
Old_locus_tag	New_locus_tag
Sugar transporters and permeases				TB-31-1_fpkm	TB-31-2_fpkm	TB-31-3_fpkm	ΔBcdim5-1_fpkm	ΔBcdim5-2_fpkm	ΔBcdim5-3_fpkm	TB-31_mean	ΔBcdim5_mean	log2(fc)	PValue	FDR
BC1G_03115	BCIN_12g02300	rco-3	Probable glucose transporter rco-3	150.46	194.44	157.81	207.98	159.17	149.89	167.57	172.347	0.0405495	0.393545	0.534734
BC1G_16090	BCIN_05g04880	rco-3	Probable glucose transporter rco-3	44.23	65.78	58.8	74.62	68.1	71.03	56.27	71.25	0.340524	0.225385	0.351265
BC1G_08389	BCIN_08g00740	HGT1	High-affinity glucose transporter	197.2	133.95	122.39	106.1	106.74	85.92	151.18	99.5867	-0.602243	2.65e-05	0.000147578
BC1G_11623	BCIN_07g05910	HGT1	High-affinity glucose transporter	2.4	4.66	3.6	3.58	3.17	2.64	3.55333	3.13	-0.18301	0.148811	0.252986
BC1G_03049	BCIN_12g01880	gluP	Glucose/galactose transporter	10.07	11.15	21.34	12.61	13.65	12.47	14.1867	12.91	-0.136047	0.179867	0.293569
BC1G_05567	BCIN_02g00620	LAC12	Lactose permease	13.71	18.34	15.84	18.66	16.52	12.91	15.9633	16.03	0.00601249	0.332688	0.473064
BC1G_05673	BCIN_06g03640	LAC12	Lactose permease	4.38	4.91	4.46	2.55	3.59	3.37	4.58333	3.17	-0.531914	0.000236967	0.00101629
BC1G_06896	BCIN_02g08950	LAC12	Lactose permease	15.24	14.64	10.78	9.56	9.71	7.78	13.5533	9.01667	-0.587982	2.49e-05	0.00013971
BC1G_12189	BCIN_01g03940	LAC12	Lactose permease	2.69	3.5	3.7	2.38	2.47	1.95	3.29667	2.26667	-0.540436	0.00271379	0.00863099
BC1G_05864	BCIN_01g01320	MAL11	General alpha-glucoside permease	9.81	12.56	13.81	9.09	8.55	9.09	12.06	8.91	-0.436733	7.66e-05	0.000377167
BC1G_08702	BCIN_12g03830	MAL11	General alpha-glucoside permease	100.94	119.81	102.48	96.59	96.98	100.74	107.743	98.1033	-0.135225	0.00672073	0.0189067
BC1G_05489	BCIN_02g00080	MAL61	Maltose permease MAL61	12.8	16.34	11.17	14.02	11.45	9.06	13.4367	11.51	-0.223287	0.0424954	0.0910605
BC1G_03637	BCIN_10g04830	sut1	General alpha-glucoside permease	82.6	76.44	60.46	60.23	54.18	56.22	73.1667	56.8767	-0.36335	0.000241102	0.00103107
BC1G_10946	BCIN_16g03430	sut1	General alpha-glucoside permease	22.6	35.47	29.13	30.93	24.43	23.25	29.0667	26.2033	-0.149615	0.061893	0.124461
Beta-glucosidases
BC1G_07110	BCIN_09g02640	bglG	Probable beta-glucosidase G	4.74	5.94	6.02	5.11	5.49	5.17	5.56667	5.25667	-0.0826654	0.105893	0.192703
BC1G_07622	BCIN_09g06990	bglM	Probable beta-glucosidase M	6.54	8.61	6.51	6.7	5.78	5.6	7.22	6.02667	-0.260639	0.00830405	0.0226472
BC1G_10231	BCIN_10g05630	bglF	Probable beta-glucosidase F	11.68	16.97	16.23	17.39	16.21	15.1	14.96	16.2333	0.117849	0.729155	0.822391
BC1G_10877	BCIN_16g03980	bgl11	Beta-glucosidase 11	20.07	35.79	28.79	31.29	29.14	29.09	28.2167	29.84	0.0807	0.612332	0.733563
BC1G_11255	BCIN_07g06700	bgl1B	Beta-glucosidase 1B	1.62	1.9	1.72	1.46	2.91	1.95	1.74667	2.10667	0.270358	0.738292	0.829067
BC1G_14164	BCIN_15g02440	bglL	Probable beta-glucosidase L	2.35	3.42	3.01	3	2.65	3.04	2.92667	2.89667	-0.0148648	0.347159	0.487096
BC1G_14786	BCIN_02g03090	bgl1A	Beta-glucosidase 1A	18.75	25.58	24.68	25.41	26.54	23.41	23.0033	25.12	0.126994	0.759302	0.842007
Cellulolytic enzymes
BC1G_08989	BCIN_14g01700	cbhC	Probable 1,4-beta-D-glucan cellobiohydrolase C	9.63	16.36	9.01	13.96	10.82	9.65	11.6667	11.4767	-0.0236887	0.389433	0.53041
BC1G_10880	BCIN_16g03950	cbhB	Probable 1,4-beta-D-glucan cellobiohydrolase B	1.62	3.59	1.94	3.81	2.23	2.5	2.38333	2.84667	0.256293	0.800857	0.874226
BC1G_02551	BCIN_02g01960	gun5	Endoglucanase-5	13.51	13.02	11.15	11.4	8.62	8.31	12.56	9.44333	-0.411468	0.00157847	0.00537225
BC1G_07822	BCIN_08g02110	celB	Endoglucanase B	3.65	5.75	4.54	4.24	3.91	3.53	4.64667	3.89333	-0.25519	0.038344	0.0834477
Hemicellulases
BC1G_07768	BCIN_15g01030	axeA	Probable acetylxylan esterase A	7.55	11.41	10.85	10.1	7.51	8.48	9.93667	8.69667	-0.192299	0.0662465	0.131473
BC1G_00576	BCIN_03g03480	xynF3	Endo-1,4-beta-xylanase F3	133.18	144.1	120.24	218.84	262.17	258.76	132.507	246.59	0.896049	1.85e-08	2.16e-07
BC1G_01778	BCIN_05g06020	xlnA	Endo-1,4-beta-xylanase	4.74	6.32	7.77	5.31	5.24	6.27	6.27667	5.60667	-0.162855	0.0962153	0.178286
BC1G_03590	BCIN_12g00090	xlnB	Probable endo-1,4-beta-xylanase B	0.8	1.16	0.55	0.28	0.29	0.25	0.836667	0.273333	-1.61399	0.00151719	0.00517908
BC1G_04994	BCIN_13g03950	abfB	Probable alpha-N-arabinofuranosidase B	2.91	5.29	3.94	6.57	4.41	4.03	4.04667	5.00333	0.306156	0.59618	0.720622
BC1G_08372	BCIN_08g00890	abfA	Alpha-N-arabinofuranosidase A	3.68	5.31	4.83	3.95	4.04	3.95	4.60667	3.98	-0.210955	0.0323544	0.0721012
BC1G_10322	BCIN_02g07700	abnA	Arabinan endo-1,5-alpha-L-arabinosidase A	20.12	31.64	19.16	15.6	11.08	12.28	23.64	12.9867	-0.864199	5.43e-07	4.58e-06
BC1G_10341	BCIN_02g07520	manA	Mannan endo-1,4-beta-mannosidase	24.79	29.57	19.7	10.69	10.82	8.14	24.6867	9.88333	-1.32066	2.36e-16	1.2e-14
BC1G_00239	BCIN_01g07260	xylB	Xylosidase/arabinosidase	10.02	10.66	10.05	11.54	11.04	11.34	10.2433	11.3067	0.142488	0.811368	0.881765
BC1G_10797	BCIN_08g00060	xylB	Xylosidase/arabinosidase	17.59	19.73	18.56	4.56	5.61	5.68	18.6267	5.28333	-1.81785	7.87e-42	2.19e-39
BC1G_00594	BCIN_03g03630	xegA	Xyloglucan-specific endo-beta-1,4-glucanase A	59.98	45.49	49.21	62.05	45.57	36.94	51.56	48.1867	-0.0976183	0.153549	0.259457
BC1G_00417	BCIN_01g05940	faeA	Probable feruloyl esterase A	35.29	41.52	40.07	42.82	42.17	39.96	38.96	41.65	0.0963228	0.50799	0.643619
BC1G_09495	BCIN_09g05740	faeB-2	Probable feruloyl esterase B-2	33.52	33.35	34.93	8.53	8.23	9.26	33.9333	8.67333	-1.96804	2.06e-65	1.18e-62
BC1G_08975	BCIN_08g05870	afcA	Alpha-fucosidase A	4.68	7.37	6.66	8.02	6.95	6.89	6.23667	7.28667	0.224484	0.766142	0.846939
Amylases, dextrinases and other saccharide degrading enzymes
BC1G_04496	BCIN_04g02660	Ycr2	Uncharacterized family 31 glucosidase ORF2 (Fragment）	4.49	6.02	6.12	7.09	7.57	7.23	5.54333	7.29667	0.396484	0.185886	0.301804
BC1G_06463	BCIN_13g05110	amy3	Alpha-amylase A type-3	474.28	540.16	508.54	661.91	688.35	720.14	507.66	690.133	0.443013	0.00864691	0.0235035
BC1G_08053	BCIN_02g05690	O16G	Oligo-1,6-glucosidase	26.22	37.09	30.04	51.83	49.35	42.78	31.1167	47.9867	0.624946	0.00218268	0.00711938
BC1G_08755	BCIN_12g03390	amyG	Glucoamylase P	4.41	3.89	3.41	2.79	3.55	2.82	3.90333	3.05333	-0.354322	0.0145751	0.0368667
BC1G_13488	BCIN_16g04060	EglX	Probable endo-1,3(4)-beta-glucanase NFIA_089530	27.4	21.42	15.83	13.98	14.68	9.47	21.55	12.71	-0.761724	3.04e-05	0.000166958
BC1G_03567	BCIN_12g00300	BgalA	Probable beta-galactosidase A	3.4	4.46	4.66	5.03	5.04	4.9	4.17333	4.99	0.25784	0.601466	0.7246
BC1G_03859	BCIN_04g06020	BgalC	Probable beta-galactosidase C	2.15	1.73	1.96	2.76	3.38	3.82	1.94667	3.32	0.770177	0.00461603	0.0137165
BC1G_06897	BCIN_02g08960	Bgal	Beta-galactosidase	6.11	8.24	8.4	10.73	9.86	10.43	7.58333	10.34	0.447332	0.0600716	0.121415
Table S2.1.2. Genes involved in the metabolic pathways related to acetyl-CoA biosynthesis and transportation were identified in B.cinerea TB-31 and ΔBcdim5.
B.cinerea B05.10 Gene ID		Protein name	Annotation
Old_locus_tag	New_locus_tag			TB-31-1_fpkm	TB-31-2_fpkm	TB-31-3_fpkm	ΔBcdim5-1_fpkm	ΔBcdim5-2_fpkm	ΔBcdim5-3_fpkm	TB-31_mean	ΔBcdim5_mean	log2(fc)	PValue	FDR
Glycolysis
BC1G_05322	BCIN_01g09990	HXK	Hexokinase-1	17.11	13.43	19.32	17.23	15.57	15.33	16.62	16.0433	-0.0509465	0.155668	0.262372
BC1G_12086	BCIN_11g05700		Hexokinase	291.93	220.71	240.08	243.88	239.77	228.97	250.907	237.54	-0.0789803	0.0661785	0.1314
BC1G_12178	BCIN_09g04170		Glucokinase	26.41	20.87	32.23	23.4	30.93	31.39	26.5033	28.5733	0.108496	0.692099	0.794959
BC1G_15108	BCIN_15g04970	GPI	Glucose-6-phosphate isomerase	97.25	76.97	95.58	152.95	182	212.77	89.9333	182.573	1.02155	6.44e-09	8.27e-08
BC1G_10994	BCIN_08g06300	PFK	6-phosphofructokinase subunit alpha	19.81	20.29	28.03	47.23	54.58	69.47	22.71	57.0933	1.32999	3.78e-12	9.07e-11
BC1G_08819	BCIN_08g04730	FBP1	Fructose-1,6-bisphosphatase	109.92	116.34	115.11	148.34	139.07	143.65	113.79	143.687	0.336552	0.119931	0.212381
BC1G_04836	BCIN_11g03090	ALDOA	Fructose-bisphosphate aldolase	565.09	598.54	592.76	720.17	711.44	683.83	585.463	705.147	0.268345	0.349673	0.489779
BC1G_08882	BCIN_08g05220	TPI	Triosephosphate isomerase	384.78	279.56	318.6	299.73	306.2	286.21	327.647	297.38	-0.139833	0.020997	0.0500677
BC1G_11968	BCIN_15g02120	GAPDH	Glyceraldehyde-3-phosphate dehydrogenase	3959.84	3024.01	3152.78	3546.45	3314.65	3157.18	3378.88	3339.43	-0.0169433	0.168766	0.278957
BC1G_09523	BCIN_09g05560		Glyceraldehyde-3-phosphate dehydrogenase	5.55	5.11	3.9	2.01	2.97	1.53	4.85333	2.17	-1.16128	1.03e-06	8.1e-06
BC1G_12890	BCIN_11g06240	PGK	Phosphoglycerate kinase	724.49	573.58	596.97	425.89	437.84	354.79	631.68	406.173	-0.637098	2.46e-08	2.8e-07
BC1G_07689	BCIN_09g06520	PGAM	phosphoglycerate mutase	44.14	39.35	47.61	41.2	53.21	52.26	43.7	48.89	0.161906	0.920454	0.950916
BC1G_03837	BCIN_04g05860		phosphoglycerate mutase	57.04	43.46	42.77	46.36	43.82	41.49	47.7567	43.89	-0.12181	0.0639631	0.127915
BC1G_11392	BCIN_02g06270		2,3-bisphosphoglycerate-independent phosphoglycerate mutase	181.91	143.14	154.66	184.07	197.63	184.65	159.903	188.783	0.239531	0.657224	0.768443
BC1G_00350	BCIN_01g06450	ENO	Enolase	2583.09	2220.13	2416.32	2528.96	2368.89	2191.53	2406.51	2363.13	-0.0262475	0.0994752	0.183278
BC1G_05305	BCIN_01g10100	PYK	Pyruvate kinase	1122.81	993.86	913.26	1037.66	963.12	818.69	1009.98	939.823	-0.10386	0.0490517	0.102848
Pentose phosphate pathway
BC1G_08348	BCIN_01g09650	G6PD	Glucose-6-phosphate 1-dehydrogenase	223.38	197.66	212.37	257.42	258.65	251.75	211.137	255.94	0.277628	0.376172	0.516634
BC1G_02744	BCIN_07g02610	PGD	6-phosphogluconate dehydrogenase, decarboxylating 2	1091.25	922.43	876.5	1033.14	1006.3	973.33	963.393	1004.26	0.0599312	0.472655	0.61251
BC1G_03095	BCIN_12g02170	RPI	Ribose-5-phosphate isomerase	85.3	82.5	77.66	91.91	90.37	94.79	81.82	92.3567	0.174763	0.9793	0.988084
BC1G_02529	BCIN_02g02110	RPE	Ribulose-phosphate 3-epimerase	163.94	124.47	134.99	93.6	93.89	89.18	141.133	92.2233	-0.613855	2.91e-08	3.26e-07
BC1G_00555	BCIN_03g03360	TAL	Transaldolase	421.44	407.7	424.29	376.93	376.88	352.08	417.81	368.63	-0.180674	0.000727469	0.00271911
BC1G_00585	BCIN_03g03550	TKT	Transketolase	7.1	8.99	9.07	8.72	8.48	7.4	8.38667	8.2	-0.0324736	0.191857	0.309361
BC1G_08475	BCIN_14g01980		Probable transketolase	322.79	366.91	372.51	359.21	374.19	341.85	354.07	358.417	0.0176031	0.14001	0.240581
BC1G_01045	BCIN_06g00790	PRPS	Ribose-phosphate pyrophosphokinase 1	21.03	19.17	26.11	24.28	23.51	23.64	22.1033	23.81	0.107304	0.649894	0.763378
BC1G_01835	BCIN_05g05580		Ribose-phosphate pyrophosphokinase 5	11.41	12.75	17.02	15.06	18.27	20.24	13.7267	17.8567	0.379481	0.219219	0.343895
BC1G_04262	BCIN_04g05060		Ribose-phosphate pyrophosphokinase 3	41.95	45.24	52.15	63.19	61.77	62.89	46.4467	62.6167	0.430972	0.0276668	0.0633509
TCA cycle
BC1G_02443	BCIN_02g02750	CS	Citrate synthase	555.2	446.36	445.13	442.13	441.6	393.21	482.23	425.647	-0.180065	0.00997272	0.0265434
BC1G_05989	BCIN_13g02440	ACLY	Probable ATP-citrate synthase subunit 1	394.58	541.46	535.11	573.49	515.48	533.7	490.383	540.89	0.141425	0.827797	0.893785
BC1G_05991	BCIN_13g02430		Probable ATP-citrate synthase subunit 2	1382.94	1212.06	1211.96	1010.5	971.12	905.81	1268.99	962.477	-0.398853	2.7e-06	1.89e-05
BC1G_04169	BCIN_04g04360	ACO	Aconitate hydratase	12.27	19.45	19.41	24.2	21.85	22.8	17.0433	22.95	0.429287	0.110781	0.199535
BC1G_04169	BCIN_04g04360		Probable aconitate hydratase 2	12.27	19.45	19.41	24.2	21.85	22.8	17.0433	22.95	0.429287	0.110781	0.199535
BC1G_07285	BCIN_07g04280	IDH	Isocitrate dehydrogenase [NAD] subunit 2	224.58	208.23	193.15	179.12	179.45	166.61	208.653	175.06	-0.253258	0.000418384	0.00166894
BC1G_00206	BCIN_01g07460		Isocitrate dehydrogenase [NAD] subunit 1	251.42	198.55	207.49	152.07	169.69	139.81	219.153	153.857	-0.510354	1.73e-06	1.27e-05
BC1G_12439	BCIN_05g01360	OGDH	2-oxoglutarate dehydrogenase	57.46	73.83	72.53	83.22	86.74	87.88	67.94	85.9467	0.33918	0.154719	0.261141
BC1G_11376	BCIN_02g06400	DLDH	Dihydrolipoyl dehydrogenase	168.86	197.05	185.25	213.81	211.12	196.42	183.72	207.117	0.172935	0.995532	0.997446
BC1G_11314	BCIN_02g06820	DLST	2-oxoglutarate dehydrogenase E2 component	345.98	301.86	293.92	226.61	232.06	182.95	313.92	213.873	-0.55364	2.4e-07	2.18e-06
BC1G_05074	BCIN_10g01530	SUCL	Probable succinyl-CoA ligase [GDP-forming] subunit alpha	529.12	387.88	422.53	233.64	250.26	200.97	446.51	228.29	-0.967825	1.8e-13	5.41e-12
BC1G_07795	BCIN_15g01180	SDH	Probable succinate dehydrogenase [ubiquinone] flavoprotein subunit	411.33	317.02	411.28	228.92	437.11	397.26	379.877	354.43	-0.10003	0.163238	0.271995
BC1G_12973	BCIN_09g03220	FH	Fumarate hydratase, mitochondrial	79.42	89.46	97.16	100.16	95.22	98.98	88.68	98.12	0.145938	0.807737	0.879207
BC1G_07409	BCIN_12g05210	MDH	Malate dehydrogenase, mitochondrial	199.68	244.37	241.01	252.88	241.93	247.38	228.353	247.397	0.115558	0.607518	0.729253
BC1G_10724	BCIN_16g04800		Malate dehydrogenase, mitochondrial	286.45	273.16	272.65	409.51	396.47	405.65	277.42	403.877	0.541843	0.000667897	0.00252001
Acetyl-CoA biosynthesis
BC1G_11347	BCIN_02g06580	PDC	Pyruvate decarboxylase	11.35	12.17	14.16	11.74	12.11	11.82	12.56	11.89	-0.0790877	0.0667868	0.132414
BC1G_06362	BCIN_13g05810	ALDH	Aldehyde dehydrogenase	385.34	430.56	399.79	409.41	350.3	341.32	405.23	367.01	-0.142922	0.00797412	0.0219032
BC1G_02079	BCIN_03g01130		Aldehyde dehydrogenase	46.25	45.68	43.18	57.6	50.57	50.77	45.0367	52.98	0.234348	0.63808	0.754157
BC1G_07090	BCIN_09g02790	ACS	Acetyl-coenzyme A synthetase	45.4	50.37	45.76	49.99	42.17	44.02	47.1767	45.3933	-0.0555931	0.0596527	0.120822
BC1G_02852	BCIN_07g01890	PDH	Pyruvate dehydrogenase E1 component subunit alpha	393.3	433.19	412.01	342.18	350.6	312.95	412.833	335.243	-0.300351	1.07e-05	6.51e-05
BC1G_08794	BCIN_08g04540		Pyruvate dehydrogenase E1 component subunit beta	106.9	159.31	153.88	155.36	148.35	134.94	140.03	146.217	0.0623718	0.47146	0.611701
BC1G_13687	BCIN_12g05730		Dihydrolipoyllysine-residue acetyltransferase component of pyruvate dehydrogenase complex	177.05	221.9	211.09	189.36	184.38	173.77	203.347	182.503	-0.156019	0.0046186	0.0137207
BC1G_11376	BCIN_02g06400		Dihydrolipoyl dehydrogenase	168.86	197.05	185.25	213.81	211.12	196.42	183.72	207.117	0.172935	0.995532	0.997446
Carnitine shuttle system
BC1G_14666	BCIN_06g07240	CRC	Mitochondrial carnitine carrier	43.48	44.86	44.25	45.73	45.71	41	44.1967	44.1467	-0.00163306	0.136684	0.235983
BC1G_14516	BCIN_03g07910	CAT	Mitochondrial carnitine O-acetyltransferase	64.92	52.75	54.02	65.84	67.38	70.62	57.23	67.9467	0.247631	0.615292	0.736078
BC1G_02490	BCIN_02g02420	YAT	Putative carnitine O-acetyltransferase	7.99	11.92	10.84	14.39	14.5	12.41	10.25	13.7667	0.425555	0.0854901	0.162301
Peroxisomal beta-oxidation
BC1G_07557	BCIN_08g03980	ACL	Putative acyl-CoA synthetase YngI	6.29	5.99	6.59	12.43	12.14	11.83	6.29	12.1333	0.947844	5.06e-08	5.36e-07
BC1G_14541	BCIN_15g04320		Putative acyl-CoA synthetase YngI	0.8	1.13	0.73	1.89	1.54	1.76	0.886667	1.73	0.964308	0.012289	0.0318849
BC1G_15689	BCIN_07g04170	ACSL	Long-chain-fatty-acid--CoA ligase 1	75.18	81.97	95.38	102	107.4	128.02	84.1767	112.473	0.418091	0.0576476	0.117461
BC1G_07013	BCIN_04g00760		Long chain acyl-CoA synthetase 7, peroxisomal	26.84	39.33	38.74	48.31	46.41	52.24	34.97	48.9867	0.486271	0.0285444	0.0650003
BC1G_08482	BCIN_14g02030	ACOX	Peroxisomal acyl-coenzyme A oxidase 1	32.3	33.63	29.16	34.19	33.26	27.93	31.6967	31.7933	0.00439315	0.212679	0.335312
BC1G_08167	BCIN_16g02260	ECI	Peroxisomal 3,2-trans-enoyl-CoA isomerase	105.13	111.7	101.31	72.92	71.13	69.72	106.047	71.2567	-0.573602	3.82e-11	7.41e-10
BC1G_10889	BCIN_16g03900		3,2-trans-enoyl-CoA isomerase	27.23	22.84	27.11	21.42	21.45	22.77	25.7267	21.88	-0.233652	0.00356352	0.0109697
BC1G_13290	BCIN_01g04960	HADH	3-ketoacyl-CoA thiolase B, peroxisomal	6.72	6.74	7.41	8.82	7.93	9.31	6.95667	8.68667	0.320406	0.38448	0.525455
BC1G_03480	BCIN_12g00940		3-ketoacyl-CoA thiolase B, peroxisomal	43.85	56.04	50.5	53.68	51.44	51.51	50.13	52.21	0.0586519	0.355845	0.496221
BC1G_00632	BCIN_03g03940		3-ketoacyl-CoA thiolase, peroxisomal	152.53	136.47	117.48	99.96	102.82	81.4	135.493	94.7267	-0.516379	4.56e-06	3.03e-05
Mitochondrial beta-oxidation
BC1G_13535	BCIN_02g07220	ACAD	Acyl-CoA dehydrogenase	52.31	55.62	47.9	54.19	55.25	58.59	51.9433	56.01	0.108746	0.564083	0.692084
BC1G_11641	BCIN_07g06070		Probable acyl-CoA dehydrogenase fadE25	19.64	17.43	15.9	24.38	22.66	20.54	17.6567	22.5267	0.351421	0.253453	0.383797
BC1G_02655	BCIN_07g03290		Acyl-CoA dehydrogenase fadE12	8.19	8.12	6.66	8.05	7.91	8.58	7.65667	8.18	0.0953844	0.623121	0.742849
BC1G_09232	BCIN_16g03180		Acyl-CoA dehydrogenase family member 11	80.96	87.75	75.46	61.02	59.59	52.85	81.39	57.82	-0.493283	1.11e-07	1.09e-06
BC1G_14434	BCIN_06g04120	ACADL	Long-chain specific acyl-CoA dehydrogenase, mitochondrial	18.31	16.36	15.57	15.01	15.76	14.18	16.7467	14.9833	-0.160515	0.0213477	0.0507728
BC1G_07476	BCIN_12g04690	ACADSB	Short/branched chain specific acyl-CoA dehydrogenase, mitochondrial	23.3	31.33	28.44	43	39.26	46.73	27.69	42.9967	0.63486	0.000860733	0.00315234
BC1G_01837	BCIN_05g05560	ECH	Enoyl-CoA hydratase, mitochondrial	5.12	5.82	5.18	7.86	8	7.55	5.37333	7.80333	0.538273	0.0359237	0.0789545
BC1G_03078	BCIN_12g02080		Putative enoyl-CoA hydratase/isomerase yngF	9.84	11.8	9.63	14.99	12.95	12.96	10.4233	13.6333	0.387322	0.221509	0.34649
BC1G_00915	BCIN_03g05840		Probable enoyl-CoA hydratase, mitochondrial	68.63	58.15	53.4	61.59	54.18	52.93	60.06	56.2333	-0.0949789	0.0678342	0.134224
BC1G_11581	BCIN_15g05380		Enoyl-CoA hydratase, mitochondrial	257.45	248.39	223.21	286.15	267.34	290.49	243.017	281.327	0.211191	0.784575	0.861789
BC1G_01675	BCIN_05g06820	HADH	3-hydroxyacyl-CoA dehydrogenase type-2	211.74	128.42	125.64	94.03	87.76	81.63	155.267	87.8067	-0.822346	3.86e-07	3.36e-06
Glyoxylate cycle
BC1G_13616	BCIN_09g01320	ICL	Isocitrate lyase	111.04	129.21	121.86	176.56	172.74	148.76	120.703	166.02	0.459892	0.0166131	0.0411008
BC1G_09443	BCIN_09g06110	MLS	Malate synthase, glyoxysomal	255.61	259.91	269.6	360.81	324.88	305.7	261.707	330.463	0.33654	0.153026	0.258719
CoA biosynthesis
BC1G_01210	BCIN_06g01960	PANK	Pantothenate kinase	15.91	18.45	21.59	39.51	38	43.22	18.65	40.2433	1.10957	5.06e-12	1.17e-10
BC1G_02344	BCIN_06g04980	PPCS	Phosphopantothenate--cysteine ligase CAB2	22.02	25.09	26.97	30.01	26.7	24.39	24.6933	27.0333	0.130618	0.774121	0.853591
BC1G_09191	BCIN_16g02860	DCAK	Dephospho-CoA kinase CAB5	22.72	21.34	16.2	22.24	19.33	19.83	20.0867	20.4667	0.027038	0.365137	0.506058
Fatty acid biosynthesis
BC1G_14055	BCIN_01g00440	FASN	Fatty acid synthase subunit alpha	26.75	34.72	36.77	44.1	43.59	44.03	32.7467	43.9067	0.423092	0.0441371	0.0939403
BC1G_14051	BCIN_01g00450		Fatty acid synthase subunit beta	35.2	40.65	42.25	50.58	49.4	50.34	39.3667	50.1067	0.348028	0.0980112	0.180998
BC1G_13188	BCIN_04g00210	MCAT	[acyl-carrier-protein] S-malonyltransferase	6.62	7.55	7.21	10.13	8.31	10.91	7.12667	9.78333	0.457099	0.102758	0.187911
Table S2.1.3. The genes involved in the ABA biosynthesis pathway were identified in B.cinerea TB-31 and ΔBcdim5.
B.cinerea B05.10 Gene ID		Protein name	Annotation
Old_locus_tag	New_locus_tag			TB-31-1_fpkm	TB-31-2_fpkm	TB-31-3_fpkm	ΔBcdim5-1_fpkm	ΔBcdim5-2_fpkm	ΔBcdim5-3_fpkm	TB-31_mean	ΔBcdim5_mean	log2(fc)	PValue	FDR
BC1G_02275	BCIN_06g05400	ACAT	Acetyl-CoA acetyltransferase	19.44	22.49	23.29	27.05	26.26	26.04	21.74	26.45	0.282916	0.386449	0.527304
BC1G_08841	BCIN_08g04860	AACS	Acetoacetyl-CoA synthetase	4.17	5.11	5.19	8.18	8.62	11.09	4.82333	9.29667	0.946683	6.54e-06	4.2e-05
BC1G_02728	BCIN_07g02750		Acetoacetyl-CoA synthetase	7.05	10.97	12.55	18.57	15.64	17.96	10.19	17.39	0.771104	0.000911427	0.0033127
BC1G_09652	BCIN_11g00330	HMGCS	Hydroxymethylglutaryl-CoA synthase	457.59	597.69	626.17	782.45	753.84	867.65	560.483	801.313	0.515695	0.00707562	0.0197459
BC1G_01518	BCIN_05g03150	HMGCR	3-hydroxy-3-methylglutaryl-coenzyme A reductase	285.9	347.12	336.93	400.76	373.66	346.83	323.317	373.75	0.209126	0.749689	0.837346
BC1G_01429	BCIN_05g03770	MVK	Mevalonate kinase	64.85	80.2	77.2	51.26	51.55	56.34	74.0833	53.05	-0.481796	9.23e-08	9.25e-07
BC1G_07491	BCIN_12g04570	PMVK	Probable phosphomevalonate kinase	37.81	51.13	49.66	53.54	51.67	55.75	46.2	53.6533	0.215775	0.739423	0.82999
BC1G_14194	BCIN_04g01890	MVD	Diphosphomevalonate decarboxylase	302.51	279.22	268.99	333.29	322.3	288.66	283.573	314.75	0.150485	0.826821	0.893294
BC1G_11480	BCIN_12g01780	IDI	Isopentenyl-diphosphate Delta-isomerase	154.67	142.64	161.25	167.99	168.91	171.28	152.853	169.393	0.148229	0.801981	0.874991
BC1G_09058	BCIN_14g01170	GGS1	geranylgeranyl pyrophosphate synthase	44.5	45.18	44.6	41.02	41.29	38.16	44.76	40.1567	-0.156571	0.00435869	0.0130456
BC1G_02940	BCIN_15g03120	FPPS	Farnesyl pyrophosphate synthase	371.81	315.81	277.79	342.59	356.66	330.22	321.803	343.157	0.0926881	0.534479	0.667236
BC1G_07529	BCIN_08g03830	ABA4	ABA4 protein	139.15	154.93	123.6	27.92	32.18	21.78	139.227	27.2933	-2.35082	2.49e-54	9.62e-52
BC1G_07530	BCIN_08g03840	ABA2	cytochrome P450 monoxygenase	646.87	716.75	635.87	274.26	297.78	249.11	666.497	273.717	-1.28391	1.39e-34	3.26e-32
BC1G_07531	BCIN_08g03850	ABA1	cytochrome P450 monooxygenase	1853.98	1910.89	1462.67	396.07	424.14	304.82	1742.51	375.01	-2.21617	1.77e-50	6.25e-48
BC1G_07534	BCIN_08g03880	ABA3	ABA3 protein	503.58	569.75	437.38	3	4.39	3.18	503.57	3.52333	-7.15911	0	0

## Sheet: Table S2.2
Table S2.2.1. Genes involved in sugar transporters and permeases were identified in B.cinerea TB-31 and ΔBchda1.
B.cinerea B05.10 Gene ID		Protein name	Annotation
Old_locus_tag	New_locus_tag
Sugar transporters and permeases				TB-31-1_fpkm	TB-31-2_fpkm	TB-31-3_fpkm	ΔBchda1-1_fpkm	ΔBchda1-2_fpkm	ΔBchda1-3_fpkm	TB-31_mean	ΔBchda1_mean	log2(fc)	PValue	FDR
BC1G_03115	BCIN_12g02300	rco-3	Probable glucose transporter rco-3	150.46	194.44	157.81	165.22	168.98	160.87	167.57	165.023	-0.0220939	0.247196	0.391644
BC1G_16090	BCIN_05g04880	rco-3	Probable glucose transporter rco-3	44.23	65.78	58.8	59.43	62.56	62.98	56.27	61.6567	0.131891	0.963168	0.979265
BC1G_08389	BCIN_08g00740	HGT1	High-affinity glucose transporter	197.2	133.95	122.39	97.66	132.44	121.53	151.18	117.21	-0.367172	0.0115097	0.0337574
BC1G_11623	BCIN_07g05910	HGT1	High-affinity glucose transporter	2.4	4.66	3.6	2.6	3.14	10.05	3.55333	5.26333	0.566804	0.524146	0.673461
BC1G_03049	BCIN_12g01880	gluP	Glucose/galactose transporter	10.07	11.15	21.34	34.73	9.82	16.21	14.1867	20.2533	0.513624	0.529187	0.678047
BC1G_05567	BCIN_02g00620	LAC12	Lactose permease	13.71	18.34	15.84	12.21	11.5	15.19	15.9633	12.9667	-0.299954	0.00715456	0.022587
BC1G_05673	BCIN_06g03640	LAC12	Lactose permease	4.38	4.91	4.46	2.77	2.95	6.26	4.58333	3.99333	-0.198804	0.190881	0.322959
BC1G_06896	BCIN_02g08950	LAC12	Lactose permease	15.24	14.64	10.78	8.6	7.8	8.76	13.5533	8.38667	-0.692478	6.02e-06	5.08e-05
BC1G_12189	BCIN_01g03940	LAC12	Lactose permease	2.69	3.5	3.7	3.99	4.17	8	3.29667	5.38667	0.708385	0.0393991	0.0925801
BC1G_05864	BCIN_01g01320	MAL11	General alpha-glucoside permease	9.81	12.56	13.81	9.32	9.35	19.47	12.06	12.7133	0.0761124	0.75548	0.846667
BC1G_08702	BCIN_12g03830	MAL11	General alpha-glucoside permease	100.94	119.81	102.48	81.53	78.8	86.36	107.743	82.23	-0.389862	3.32e-05	0.000225997
BC1G_05489	BCIN_02g00080	MAL61	Maltose permease MAL61	12.8	16.34	11.17	9.98	15.24	18.74	13.4367	14.6533	0.125054	0.908265	0.94814
BC1G_03637	BCIN_10g04830	sut1	General alpha-glucoside permease	82.6	76.44	60.46	46.65	55.27	50.2	73.1667	50.7067	-0.529011	5.37e-05	0.000340245
BC1G_10946	BCIN_16g03430	sut1	General alpha-glucoside permease	22.6	35.47	29.13	25.67	24.92	26.27	29.0667	25.62	-0.182095	0.0528734	0.117995
Beta-glucosidases
BC1G_07110	BCIN_09g02640	bglG	Probable beta-glucosidase G	4.74	5.94	6.02	4.25	4.79	4.93	5.56667	4.65667	-0.257516	0.0220515	0.0575742
BC1G_07622	BCIN_09g06990	bglM	Probable beta-glucosidase M	6.54	8.61	6.51	5.22	5.93	8.95	7.22	6.7	-0.107838	0.203201	0.338593
BC1G_10231	BCIN_10g05630	bglF	Probable beta-glucosidase F	11.68	16.97	16.23	16.24	17.47	31.97	14.96	21.8933	0.549381	0.080284	0.164157
BC1G_10877	BCIN_16g03980	bgl11	Beta-glucosidase 11	20.07	35.79	28.79	31.17	32.49	80.27	28.2167	47.9767	0.765785	0.197243	0.331406
BC1G_11255	BCIN_07g06700	bgl1B	Beta-glucosidase 1B	1.62	1.9	1.72	1.14	1.41	3.46	1.74667	2.00333	0.197798	0.891889	0.938124
BC1G_14164	BCIN_15g02440	bglL	Probable beta-glucosidase L	2.35	3.42	3.01	2.52	2.41	3.67	2.92667	2.86667	-0.0298843	0.450319	0.607109
BC1G_14786	BCIN_02g03090	bgl1A	Beta-glucosidase 1A	18.75	25.58	24.68	23.18	24.95	35.68	23.0033	27.9367	0.280317	0.462774	0.618602
Cellulolytic enzymes
BC1G_08989	BCIN_14g01700	cbhC	Probable 1,4-beta-D-glucan cellobiohydrolase C	9.63	16.36	9.01	7	7.3	17.89	11.6667	10.73	-0.120742	0.370069	0.526648
BC1G_10880	BCIN_16g03950	cbhB	Probable 1,4-beta-D-glucan cellobiohydrolase B	1.62	3.59	1.94	2.06	3.36	8.4	2.38333	4.60667	0.950742	0.0597458	0.130489
BC1G_02551	BCIN_02g01960	gun5	Endoglucanase-5	13.51	13.02	11.15	10.7	13.99	20.98	12.56	15.2233	0.277448	0.589305	0.727615
BC1G_07822	BCIN_08g02110	celB	Endoglucanase B	3.65	5.75	4.54	6.97	9.08	14.09	4.64667	10.0467	1.11245	0.000113608	0.000665107
Hemicellulases
BC1G_07768	BCIN_15g01030	axeA	Probable acetylxylan esterase A	7.55	11.41	10.85	11.92	13.06	23.02	9.93667	16	0.687238	0.0277021	0.0695106
BC1G_00576	BCIN_03g03480	xynF3	Endo-1,4-beta-xylanase F3	133.18	144.1	120.24	100.2	123.71	158.66	132.507	127.523	-0.0553037	0.22411	0.365207
BC1G_01778	BCIN_05g06020	xlnA	Endo-1,4-beta-xylanase	4.74	6.32	7.77	7.37	5.79	8.31	6.27667	7.15667	0.189289	0.822844	0.895638
BC1G_03590	BCIN_12g00090	xlnB	Probable endo-1,4-beta-xylanase B	0.8	1.16	0.55	0.33	0.46	0.62	0.836667	0.47	-0.831992	0.0628827	0.135781
BC1G_04994	BCIN_13g03950	abfB	Probable alpha-N-arabinofuranosidase B	2.91	5.29	3.94	4.63	5.11	15.81	4.04667	8.51667	1.07355	0.123058	0.230246
BC1G_08372	BCIN_08g00890	abfA	Alpha-N-arabinofuranosidase A	3.68	5.31	4.83	3.61	3.23	6.05	4.60667	4.29667	-0.100505	0.295636	0.448752
BC1G_10322	BCIN_02g07700	abnA	Arabinan endo-1,5-alpha-L-arabinosidase A	20.12	31.64	19.16	16.84	22.63	24.78	23.64	21.4167	-0.142496	0.182698	0.312332
BC1G_10341	BCIN_02g07520	manA	Mannan endo-1,4-beta-mannosidase	24.79	29.57	19.7	15.26	16.74	16.75	24.6867	16.25	-0.603292	2.59e-05	0.000182261
BC1G_00239	BCIN_01g07260	xylB	Xylosidase/arabinosidase	10.02	10.66	10.05	11.21	10.39	12.41	10.2433	11.3367	0.146311	0.998551	0.99955
BC1G_10797	BCIN_08g00060	xylB	Xylosidase/arabinosidase	17.59	19.73	18.56	33.48	37.11	26.53	18.6267	32.3733	0.797436	0.000138517	0.000794632
BC1G_00594	BCIN_03g03630	xegA	Xyloglucan-specific endo-beta-1,4-glucanase A	59.98	45.49	49.21	45.71	52.35	40.97	51.56	46.3433	-0.15389	0.094914	0.187569
BC1G_00417	BCIN_01g05940	faeA	Probable feruloyl esterase A	35.29	41.52	40.07	35.6	37.99	42.54	38.96	38.71	-0.00928737	0.246112	0.390593
BC1G_09495	BCIN_09g05740	faeB-2	Probable feruloyl esterase B-2	33.52	33.35	34.93	44.78	42.08	34.89	33.9333	40.5833	0.258184	0.44399	0.602103
BC1G_08975	BCIN_08g05870	afcA	Alpha-fucosidase A	4.68	7.37	6.66	6.36	7.81	16.82	6.23667	10.33	0.727993	0.0473022	0.10779
Amylases, dextrinases and other saccharide degrading enzymes
BC1G_04496	BCIN_04g02660	Ycr2	Uncharacterized family 31 glucosidase ORF2 (Fragment）	4.49	6.02	6.12	6.3	7.62	9.71	5.54333	7.87667	0.506831	0.0752184	0.15636
BC1G_06463	BCIN_13g05110	amy3	Alpha-amylase A type-3	474.28	540.16	508.54	664.65	668.74	818.65	507.66	717.347	0.498808	0.00508368	0.0171324
BC1G_08053	BCIN_02g05690	O16G	Oligo-1,6-glucosidase	26.22	37.09	30.04	36.22	39.98	53.55	31.1167	43.25	0.475013	0.0624314	0.134928
BC1G_08755	BCIN_12g03390	amyG	Glucoamylase P	4.41	3.89	3.41	2.58	3.14	3.53	3.90333	3.08333	-0.340216	0.0317527	0.0777849
BC1G_13488	BCIN_16g04060	EglX	Probable endo-1,3(4)-beta-glucanase NFIA_089530	27.4	21.42	15.83	6.77	6.92	5.47	21.55	6.38667	-1.75455	3.66e-16	3.12e-14
BC1G_03567	BCIN_12g00300	BgalA	Probable beta-galactosidase A	3.4	4.46	4.66	4.02	4.26	13.65	4.17333	7.31	0.808671	0.251937	0.397212
BC1G_03859	BCIN_04g06020	BgalC	Probable beta-galactosidase C	2.15	1.73	1.96	3.41	4.58	6.88	1.94667	4.95667	1.34836	2.1e-06	2.05e-05
BC1G_06897	BCIN_02g08960	Bgal	Beta-galactosidase	6.11	8.24	8.4	8.79	8.89	12.18	7.58333	9.95333	0.392348	0.162855	0.285998
Table S2.2.2. Genes involved in the metabolic pathways related to acetyl-CoA biosynthesis and transportation were identified in B.cinerea TB-31 and ΔBchda1.
B.cinerea B05.10 Gene ID		Protein name	Annotation
Old_locus_tag	New_locus_tag			TB-31-1_fpkm	TB-31-2_fpkm	TB-31-3_fpkm	ΔBchda1-1_fpkm	ΔBchda1-2_fpkm	ΔBchda1-3_fpkm	TB-31_mean	ΔBchda1_mean	log2(fc)	PValue	FDR
Glycolysis
BC1G_05322	BCIN_01g09990	HXK	Hexokinase-1	17.11	13.43	19.32	20.73	11.73	16.08	16.62	16.18	-0.0387088	0.389373	0.546398
BC1G_12086	BCIN_11g05700		Hexokinase	291.93	220.71	240.08	276.96	264.65	230.48	250.907	257.363	0.0366557	0.514049	0.664775
BC1G_12178	BCIN_09g04170		Glucokinase	26.41	20.87	32.23	26.47	23.13	29.61	26.5033	26.4033	-0.00545374	0.378985	0.536067
BC1G_15108	BCIN_15g04970	GPI	Glucose-6-phosphate isomerase	97.25	76.97	95.58	180.96	179.14	187.12	89.9333	182.407	1.02023	3.55e-10	9.03e-09
BC1G_10994	BCIN_08g06300	PFK	6-phosphofructokinase subunit alpha	19.81	20.29	28.03	50.16	47.97	61.15	22.71	53.0933	1.2252	1.6e-11	5.42e-10
BC1G_08819	BCIN_08g04730	FBP1	Fructose-1,6-bisphosphatase	109.92	116.34	115.11	131.07	130.38	141.01	113.79	134.153	0.237509	0.421502	0.579408
BC1G_04836	BCIN_11g03090	ALDOA	Fructose-bisphosphate aldolase	565.09	598.54	592.76	731.46	738.83	698.23	585.463	722.84	0.304098	0.177699	0.306067
BC1G_08882	BCIN_08g05220	TPI	Triosephosphate isomerase	384.78	279.56	318.6	234.49	236.16	258.63	327.647	243.093	-0.430631	0.000197541	0.001079
BC1G_11968	BCIN_15g02120	GAPDH	Glyceraldehyde-3-phosphate dehydrogenase	3959.84	3024.01	3152.78	2925.89	3246.85	2523.76	3378.88	2898.83	-0.221071	0.0355991	0.0852558
BC1G_09523	BCIN_09g05560		Glyceraldehyde-3-phosphate dehydrogenase	5.55	5.11	3.9	2.01	1.77	1.4	4.85333	1.72667	-1.49099	1.27e-09	2.79e-08
BC1G_12890	BCIN_11g06240	PGK	Phosphoglycerate kinase	724.49	573.58	596.97	343.61	364.41	285.39	631.68	331.137	-0.931767	2.18e-10	5.85e-09
BC1G_07689	BCIN_09g06520	PGAM	phosphoglycerate mutase	44.14	39.35	47.61	54.23	45.66	55.44	43.7	51.7767	0.244669	0.496665	0.649915
BC1G_03837	BCIN_04g05860		phosphoglycerate mutase	57.04	43.46	42.77	34.57	36.93	31.86	47.7567	34.4533	-0.471059	0.000698914	0.00317987
BC1G_11392	BCIN_02g06270		2,3-bisphosphoglycerate-independent phosphoglycerate mutase	181.91	143.14	154.66	151.63	156.3	142.23	159.903	150.053	-0.0917246	0.121287	0.227678
BC1G_00350	BCIN_01g06450	ENO	Enolase	2583.09	2220.13	2416.32	2396.14	2533.22	1927.35	2406.51	2285.57	-0.0743904	0.183893	0.313839
BC1G_05305	BCIN_01g10100	PYK	Pyruvate kinase	1122.81	993.86	913.26	1033.5	1029.95	741.32	1009.98	934.923	-0.111402	0.166348	0.29077
Pentose phosphate pathway
BC1G_08348	BCIN_01g09650	G6PD	Glucose-6-phosphate 1-dehydrogenase	223.38	197.66	212.37	269.53	253.34	243	211.137	255.29	0.27396	0.335244	0.490301
BC1G_02744	BCIN_07g02610	PGD	6-phosphogluconate dehydrogenase, decarboxylating 2	1091.25	922.43	876.5	1030.09	1075.98	879.16	963.393	995.077	0.0466827	0.628795	0.756347
BC1G_03095	BCIN_12g02170	RPI	Ribose-5-phosphate isomerase	85.3	82.5	77.66	83.33	82.23	77.18	81.82	80.9133	-0.0160761	0.23746	0.38019
BC1G_02529	BCIN_02g02110	RPE	Ribulose-phosphate 3-epimerase	163.94	124.47	134.99	83.27	89.21	76.32	141.133	82.9333	-0.767035	3.95e-08	6e-07
BC1G_00555	BCIN_03g03360	TAL	Transaldolase	421.44	407.7	424.29	378.5	393.04	358.38	417.81	376.64	-0.149661	0.0212372	0.0557518
BC1G_00585	BCIN_03g03550	TKT	Transketolase	7.1	8.99	9.07	7.77	7.97	6.96	8.38667	7.56667	-0.14844	0.0934119	0.185278
BC1G_08475	BCIN_14g01980		Probable transketolase	322.79	366.91	372.51	403.97	366.76	359.43	354.07	376.72	0.089458	0.688315	0.802764
BC1G_01045	BCIN_06g00790	PRPS	Ribose-phosphate pyrophosphokinase 1	21.03	19.17	26.11	30.84	22.05	21.11	22.1033	24.6667	0.158299	0.918684	0.954692
BC1G_01835	BCIN_05g05580		Ribose-phosphate pyrophosphokinase 5	11.41	12.75	17.02	19.35	13.43	16.57	13.7267	16.45	0.261106	0.523498	0.672916
BC1G_04262	BCIN_04g05060		Ribose-phosphate pyrophosphokinase 3	41.95	45.24	52.15	64.05	55.67	52.97	46.4467	57.5633	0.309575	0.25058	0.395769
TCA cycle
BC1G_02443	BCIN_02g02750	CS	Citrate synthase	555.2	446.36	445.13	504.14	501.43	439.39	482.23	481.653	-0.00172626	0.354957	0.511463
BC1G_05989	BCIN_13g02440	ACLY	Probable ATP-citrate synthase subunit 1	394.58	541.46	535.11	624.51	538.93	634.02	490.383	599.153	0.289015	0.307645	0.461082
BC1G_05991	BCIN_13g02430		Probable ATP-citrate synthase subunit 2	1382.94	1212.06	1211.96	1051.59	998.13	977.36	1268.99	1009.03	-0.330713	0.000476783	0.0022841
BC1G_04169	BCIN_04g04360	ACO	Aconitate hydratase	12.27	19.45	19.41	21.95	19.82	25.07	17.0433	22.28	0.386542	0.17222	0.298768
BC1G_04169	BCIN_04g04360		Probable aconitate hydratase 2	12.27	19.45	19.41	21.95	19.82	25.07	17.0433	22.28	0.386542	0.17222	0.298768
BC1G_07285	BCIN_07g04280	IDH	Isocitrate dehydrogenase [NAD] subunit 2	224.58	208.23	193.15	185.87	186.77	172.91	208.653	181.85	-0.198359	0.0143481	0.0404187
BC1G_00206	BCIN_01g07460		Isocitrate dehydrogenase [NAD] subunit 1	251.42	198.55	207.49	185.12	186.19	159.38	219.153	176.897	-0.309034	0.00498375	0.0168502
BC1G_12439	BCIN_05g01360	OGDH	2-oxoglutarate dehydrogenase	57.46	73.83	72.53	81.55	83.56	101.72	67.94	88.9433	0.388625	0.0804681	0.164449
BC1G_11376	BCIN_02g06400	DLDH	Dihydrolipoyl dehydrogenase	168.86	197.05	185.25	201.54	195.34	204.25	183.72	200.377	0.125206	0.88259	0.931876
BC1G_11314	BCIN_02g06820	DLST	2-oxoglutarate dehydrogenase E2 component	345.98	301.86	293.92	215.77	234.03	182.73	313.92	210.843	-0.574226	9.24e-06	7.46e-05
BC1G_05074	BCIN_10g01530	SUCL	Probable succinyl-CoA ligase [GDP-forming] subunit alpha	529.12	387.88	422.53	244.38	252.71	199.28	446.51	232.123	-0.943801	1.06e-09	2.41e-08
BC1G_07795	BCIN_15g01180	SDH	Probable succinate dehydrogenase [ubiquinone] flavoprotein subunit	411.33	317.02	411.28	407	254.23	283.2	379.877	314.81	-0.27105	0.0323534	0.0790626
BC1G_12973	BCIN_09g03220	FH	Fumarate hydratase, mitochondrial	79.42	89.46	97.16	96.02	89.53	103.85	88.68	96.4667	0.121422	0.860525	0.921753
BC1G_07409	BCIN_12g05210	MDH	Malate dehydrogenase, mitochondrial	199.68	244.37	241.01	292.18	306.52	332.67	228.353	310.457	0.443124	0.0169346	0.0463361
BC1G_10724	BCIN_16g04800		Malate dehydrogenase, mitochondrial	286.45	273.16	272.65	347.13	359.75	352.56	277.42	353.147	0.348196	0.108911	0.209231
Acetyl-CoA biosynthesis
BC1G_11347	BCIN_02g06580	PDC	Pyruvate decarboxylase	11.35	12.17	14.16	13.43	14.11	19.53	12.56	15.69	0.321009	0.311522	0.464858
BC1G_06362	BCIN_13g05810	ALDH	Aldehyde dehydrogenase	385.34	430.56	399.79	406.76	469.75	471.93	405.23	449.48	0.149516	0.964109	0.979573
BC1G_02079	BCIN_03g01130		Aldehyde dehydrogenase	46.25	45.68	43.18	44.04	45.65	47.61	45.0367	45.7667	0.0231972	0.339197	0.494518
BC1G_07090	BCIN_09g02790	ACS	Acetyl-coenzyme A synthetase	45.4	50.37	45.76	42.82	43.38	48.89	47.1767	45.03	-0.067187	0.088871	0.178128
BC1G_02852	BCIN_07g01890	PDH	Pyruvate dehydrogenase E1 component subunit alpha	393.3	433.19	412.01	362.28	327.41	325.14	412.833	338.277	-0.287356	0.000609053	0.00282247
BC1G_08794	BCIN_08g04540		Pyruvate dehydrogenase E1 component subunit beta	106.9	159.31	153.88	154.31	145.93	146.61	140.03	148.95	0.0890922	0.760934	0.849796
BC1G_13687	BCIN_12g05730		Dihydrolipoyllysine-residue acetyltransferase component of pyruvate dehydrogenase complex	177.05	221.9	211.09	191.28	164.89	178.06	203.347	178.077	-0.191443	0.0126611	0.036465
BC1G_11376	BCIN_02g06400		Dihydrolipoyl dehydrogenase	168.86	197.05	185.25	201.54	195.34	204.25	183.72	200.377	0.125206	0.88259	0.931876
Carnitine shuttle system
BC1G_14666	BCIN_06g07240	CRC	Mitochondrial carnitine carrier	43.48	44.86	44.25	40.05	40.51	42.59	44.1967	41.05	-0.106555	0.0446522	0.102768
BC1G_14516	BCIN_03g07910	CAT	Mitochondrial carnitine O-acetyltransferase	64.92	52.75	54.02	65.55	64.25	76.11	57.23	68.6367	0.262208	0.455493	0.612023
BC1G_02490	BCIN_02g02420	YAT	Putative carnitine O-acetyltransferase	7.99	11.92	10.84	13.13	13.4	15.38	10.25	13.97	0.446708	0.0578297	0.126999
Peroxisomal beta-oxidation
BC1G_07557	BCIN_08g03980	ACL	Putative acyl-CoA synthetase YngI	6.29	5.99	6.59	10.15	9.9	15.19	6.29	11.7467	0.90112	6.98e-05	0.000428522
BC1G_14541	BCIN_15g04320		Putative acyl-CoA synthetase YngI	0.8	1.13	0.73	0.68	0.68	1.23	0.886667	0.863333	-0.0384741	0.628153	0.755802
BC1G_15689	BCIN_07g04170	ACSL	Long-chain-fatty-acid--CoA ligase 1	75.18	81.97	95.38	109.38	100.23	121.6	84.1767	110.403	0.391291	0.0603863	0.131576
BC1G_07013	BCIN_04g00760		Long chain acyl-CoA synthetase 7, peroxisomal	26.84	39.33	38.74	41.63	39.25	62.56	34.97	47.8133	0.451295	0.110129	0.210848
BC1G_08482	BCIN_14g02030	ACOX	Peroxisomal acyl-coenzyme A oxidase 1	32.3	33.63	29.16	26.08	26.18	35.34	31.6967	29.2	-0.118363	0.0842572	0.17065
BC1G_08167	BCIN_16g02260	ECI	Peroxisomal 3,2-trans-enoyl-CoA isomerase	105.13	111.7	101.31	64.41	82.35	77.23	106.047	74.6633	-0.506227	8.84e-06	7.14e-05
BC1G_10889	BCIN_16g03900		3,2-trans-enoyl-CoA isomerase	27.23	22.84	27.11	19.35	20.58	22.41	25.7267	20.78	-0.308069	0.00258193	0.00969054
BC1G_13290	BCIN_01g04960	HADH	3-ketoacyl-CoA thiolase B, peroxisomal	6.72	6.74	7.41	8.54	8.24	9.07	6.95667	8.61667	0.308734	0.33856	0.49377
BC1G_03480	BCIN_12g00940		3-ketoacyl-CoA thiolase B, peroxisomal	43.85	56.04	50.5	52.97	55.22	86.7	50.13	64.9633	0.373951	0.227816	0.369739
BC1G_00632	BCIN_03g03940		3-ketoacyl-CoA thiolase, peroxisomal	152.53	136.47	117.48	89.15	98.1	91.98	135.493	93.0767	-0.54173	8.72e-06	7.08e-05
Mitochondrial beta-oxidation
BC1G_13535	BCIN_02g07220	ACAD	Acyl-CoA dehydrogenase	52.31	55.62	47.9	57.04	60.21	73.01	51.9433	63.42	0.287999	0.329789	0.48523
BC1G_11641	BCIN_07g06070		Probable acyl-CoA dehydrogenase fadE25	19.64	17.43	15.9	22.63	36.58	23.69	17.6567	27.6333	0.646197	0.0184819	0.0496942
BC1G_02655	BCIN_07g03290		Acyl-CoA dehydrogenase fadE12	8.19	8.12	6.66	7.34	9.57	10.33	7.65667	9.08	0.245976	0.627035	0.754698
BC1G_09232	BCIN_16g03180		Acyl-CoA dehydrogenase family member 11	80.96	87.75	75.46	42.47	51.95	76.54	81.39	56.9867	-0.514227	0.000445596	0.00216546
BC1G_14434	BCIN_06g04120	ACADL	Long-chain specific acyl-CoA dehydrogenase, mitochondrial	18.31	16.36	15.57	14.61	14.4	15.28	16.7467	14.7633	-0.181855	0.0348607	0.0838728
BC1G_07476	BCIN_12g04690	ACADSB	Short/branched chain specific acyl-CoA dehydrogenase, mitochondrial	23.3	31.33	28.44	38.67	38.84	50.23	27.69	42.58	0.620811	0.00261452	0.0097975
BC1G_01837	BCIN_05g05560	ECH	Enoyl-CoA hydratase, mitochondrial	5.12	5.82	5.18	7.01	7.71	13.6	5.37333	9.44	0.81297	0.00669912	0.0214315
BC1G_03078	BCIN_12g02080		Putative enoyl-CoA hydratase/isomerase yngF	9.84	11.8	9.63	11.62	13.45	21.03	10.4233	15.3667	0.559988	0.0700463	0.148035
BC1G_00915	BCIN_03g05840		Probable enoyl-CoA hydratase, mitochondrial	68.63	58.15	53.4	45.88	56.25	60.33	60.06	54.1533	-0.149354	0.0762094	0.1579
BC1G_11581	BCIN_15g05380		Enoyl-CoA hydratase, mitochondrial	257.45	248.39	223.21	293.37	312.25	274.85	243.017	293.49	0.272256	0.370024	0.526646
BC1G_01675	BCIN_05g06820	HADH	3-hydroxyacyl-CoA dehydrogenase type-2	211.74	128.42	125.64	94	103.96	83.78	155.267	93.9133	-0.725346	6.48e-05	0.000401618
Glyoxylate cycle
BC1G_13616	BCIN_09g01320	ICL	Isocitrate lyase	111.04	129.21	121.86	103.55	98.66	113.48	120.703	105.23	-0.197919	0.00458521	0.0157154
BC1G_09443	BCIN_09g06110	MLS	Malate synthase, glyoxysomal	255.61	259.91	269.6	236.77	239.34	268.64	261.707	248.25	-0.076157	0.0532471	0.118564
CoA biosynthesis
BC1G_01210	BCIN_06g01960	PANK	Pantothenate kinase	15.91	18.45	21.59	39.94	34.35	47.83	18.65	40.7067	1.12609	1.15e-09	2.57e-08
BC1G_02344	BCIN_06g04980	PPCS	Phosphopantothenate--cysteine ligase CAB2	22.02	25.09	26.97	27.91	32.62	46.2	24.6933	35.5767	0.52681	0.035414	0.0848803
BC1G_09191	BCIN_16g02860	DCAK	Dephospho-CoA kinase CAB5	22.72	21.34	16.2	16.33	18.21	20.44	20.0867	18.3267	-0.132294	0.122208	0.229049
Fatty acid biosynthesis
BC1G_14055	BCIN_01g00440	FASN	Fatty acid synthase subunit alpha	26.75	34.72	36.77	42.59	37.13	42.04	32.7467	40.5867	0.309658	0.236361	0.379037
BC1G_14051	BCIN_01g00450		Fatty acid synthase subunit beta	35.2	40.65	42.25	52.23	45.26	47.29	39.3667	48.26	0.293853	0.23858	0.381524
BC1G_13188	BCIN_04g00210	MCAT	[acyl-carrier-protein] S-malonyltransferase	6.62	7.55	7.21	8.62	9.89	11.1	7.12667	9.87	0.469823	0.0669056	0.142618
Table S2.2.3. The genes involved in the ABA biosynthesis pathway were identified in B.cinerea TB-31 and ΔBchda1.
B.cinerea B05.10 Gene ID		Protein name	Annotation
Old_locus_tag	New_locus_tag			TB-31-1_fpkm	TB-31-2_fpkm	TB-31-3_fpkm	ΔBchda1-1_fpkm	ΔBchda1-2_fpkm	ΔBchda1-3_fpkm	TB-31_mean	ΔBchda1_mean	log2(fc)	PValue	FDR
BC1G_02275	BCIN_06g05400	ACAT	Acetyl-CoA acetyltransferase	19.44	22.49	23.29	24.65	27.83	34.31	21.74	28.93	0.412214	0.091198	0.181819
BC1G_08841	BCIN_08g04860	AACS	Acetoacetyl-CoA synthetase	4.17	5.11	5.19	10.51	6.93	10.59	4.82333	9.34333	0.953907	4.26e-05	0.000281619
BC1G_02728	BCIN_07g02750		Acetoacetyl-CoA synthetase	7.05	10.97	12.55	14.59	13.88	22.04	10.19	16.8367	0.724452	0.00787334	0.0244885
BC1G_09652	BCIN_11g00330	HMGCS	Hydroxymethylglutaryl-CoA synthase	457.59	597.69	626.17	746.79	712.73	616.92	560.483	692.147	0.304406	0.275706	0.42589
BC1G_01518	BCIN_05g03150	HMGCR	3-hydroxy-3-methylglutaryl-coenzyme A reductase	285.9	347.12	336.93	343.53	311.73	330.2	323.317	328.487	0.0228869	0.340666	0.496236
BC1G_01429	BCIN_05g03770	MVK	Mevalonate kinase	64.85	80.2	77.2	77.24	83.48	93.1	74.0833	84.6067	0.191622	0.641033	0.767063
BC1G_07491	BCIN_12g04570	PMVK	Probable phosphomevalonate kinase	37.81	51.13	49.66	64.41	57.08	61.98	46.2	61.1567	0.404617	0.0672188	0.143209
BC1G_14194	BCIN_04g01890	MVD	Diphosphomevalonate decarboxylase	302.51	279.22	268.99	256.37	274.19	248.76	283.573	259.773	-0.126469	0.0483639	0.109723
BC1G_11480	BCIN_12g01780	IDI	Isopentenyl-diphosphate Delta-isomerase	154.67	142.64	161.25	149.9	150.94	157.2	152.853	152.68	-0.00163692	0.234942	0.377672
BC1G_09058	BCIN_14g01170	GGS1	geranylgeranyl pyrophosphate synthase	44.5	45.18	44.6	36.17	39.37	37.02	44.76	37.52	-0.25455	0.00280778	0.0104014
BC1G_02940	BCIN_15g03120	FPPS	Farnesyl pyrophosphate synthase	371.81	315.81	277.79	328.56	333.79	327.95	321.803	330.1	0.0367239	0.472143	0.62729
BC1G_07529	BCIN_08g03830	ABA4	ABA4 protein	139.15	154.93	123.6	28.76	30.32	50.04	139.227	36.3733	-1.93648	3.13e-26	1.56e-23
BC1G_07530	BCIN_08g03840	ABA2	cytochrome P450 monoxygenase	646.87	716.75	635.87	290.28	281.32	427.15	666.497	332.917	-1.00144	1.07e-12	4.78e-11
BC1G_07531	BCIN_08g03850	ABA1	cytochrome P450 monooxygenase	1853.98	1910.89	1462.67	538.41	530.74	647.99	1742.51	572.38	-1.60612	1.93e-30	2.95e-27
BC1G_07534	BCIN_08g03880	ABA3	ABA3 protein	503.58	569.75	437.38	9.01	10.26	122.11	503.57	47.1267	-3.41758	0.00129396	0.00537498

## Sheet: Table S2.3
Table S2.3.1. Genes involved in sugar transporters and permeases were identified in B.cinerea TB-31 and Bchda1-OE-X24.
B.cinerea B05.10 Gene ID		Protein name	Annotation
Old_locus_tag	New_locus_tag
Sugar transporters and permeases				TB-31-1_fpkm	TB-31-2_fpkm	TB-31-3_fpkm	Bchda1-OE-X24-1_fpkm	Bchda1-OE-X24-2_fpkm	Bchda1-OE-X24-3_fpkm	TB-31_mean	Bchda1-OE-X24_mean	log2(fc)	PValue	FDR
BC1G_03115	BCIN_12g02300	rco-3	Probable glucose transporter rco-3	150.46	194.44	157.81	132.49	124.76	139.41	167.57	132.22	-0.341823	0.0198033	0.0760004
BC1G_16090	BCIN_05g04880	rco-3	Probable glucose transporter rco-3	44.23	65.78	58.8	40.35	64.54	65.15	56.27	56.68	0.0104738	0.720398	0.841992
BC1G_08389	BCIN_08g00740	HGT1	High-affinity glucose transporter	197.2	133.95	122.39	154.07	184.38	69.79	151.18	136.08	-0.151812	0.467883	0.663567
BC1G_11623	BCIN_07g05910	HGT1	High-affinity glucose transporter	2.4	4.66	3.6	8.42	23.04	11.98	3.55333	14.48	2.02682	6.58e-07	2.54e-05
BC1G_03049	BCIN_12g01880	gluP	Glucose/galactose transporter	10.07	11.15	21.34	18.65	19.44	77.99	14.1867	38.6933	1.44755	0.00574678	0.0305798
BC1G_05567	BCIN_02g00620	LAC12	Lactose permease	13.71	18.34	15.84	17.08	19.56	25.8	15.9633	20.8133	0.382746	0.258781	0.455641
BC1G_05673	BCIN_06g03640	LAC12	Lactose permease	4.38	4.91	4.46	5.94	10.62	7.48	4.58333	8.01333	0.806005	0.0132423	0.0568869
BC1G_06896	BCIN_02g08950	LAC12	Lactose permease	15.24	14.64	10.78	8.62	13.54	8.56	13.5533	10.24	-0.404432	0.0745814	0.194378
BC1G_12189	BCIN_01g03940	LAC12	Lactose permease	2.69	3.5	3.7	8.81	20.72	9.81	3.29667	13.1133	1.99195	1.48e-07	7.33e-06
BC1G_05864	BCIN_01g01320	MAL11	General alpha-glucoside permease	9.81	12.56	13.81	18.75	30.69	30.96	12.06	26.8	1.152	9.59e-05	0.00144003
BC1G_08702	BCIN_12g03830	MAL11	General alpha-glucoside permease	100.94	119.81	102.48	78.47	110.19	106.41	107.743	98.3567	-0.131504	0.283363	0.483219
BC1G_05489	BCIN_02g00080	MAL61	Maltose permease MAL61	12.8	16.34	11.17	16.62	29.96	12.66	13.4367	19.7467	0.555434	0.184184	0.361793
BC1G_03637	BCIN_10g04830	sut1	General alpha-glucoside permease	82.6	76.44	60.46	51.79	59.46	36.14	73.1667	49.13	-0.574582	0.0105624	0.0484087
BC1G_10946	BCIN_16g03430	sut1	General alpha-glucoside permease	22.6	35.47	29.13	22.71	25.97	19.07	29.0667	22.5833	-0.364107	0.0585795	0.163379
Beta-glucosidases
BC1G_07110	BCIN_09g02640	bglG	Probable beta-glucosidase G	4.74	5.94	6.02	4.52	5.94	4.38	5.56667	4.94667	-0.170357	0.265363	0.463825
BC1G_07622	BCIN_09g06990	bglM	Probable beta-glucosidase M	6.54	8.61	6.51	10.7	15.35	9.75	7.22	11.9333	0.724926	0.0251758	0.0908691
BC1G_10231	BCIN_10g05630	bglF	Probable beta-glucosidase F	11.68	16.97	16.23	31.73	49.25	34.07	14.96	38.35	1.35812	1.93e-06	6.43e-05
BC1G_10877	BCIN_16g03980	bgl11	Beta-glucosidase 11	20.07	35.79	28.79	112.88	158.61	106.36	28.2167	125.95	2.15823	1.73e-13	3.69e-11
BC1G_11255	BCIN_07g06700	bgl1B	Beta-glucosidase 1B	1.62	1.9	1.72	3.5	5.8	2.94	1.74667	4.08	1.22396	0.00134764	0.0106761
BC1G_14164	BCIN_15g02440	bglL	Probable beta-glucosidase L	2.35	3.42	3.01	9.2	8.04	6.06	2.92667	7.76667	1.40804	1.43e-06	5.06e-05
BC1G_14786	BCIN_02g03090	bgl1A	Beta-glucosidase 1A	18.75	25.58	24.68	63.8	69.56	56.89	23.0033	63.4167	1.46302	4.4e-10	4.94e-08
Cellulolytic enzymes
BC1G_08989	BCIN_14g01700	cbhC	Probable 1,4-beta-D-glucan cellobiohydrolase C	9.63	16.36	9.01	36.07	33.68	16.55	11.6667	28.7667	1.30201	0.000664116	0.00632677
BC1G_10880	BCIN_16g03950	cbhB	Probable 1,4-beta-D-glucan cellobiohydrolase B	1.62	3.59	1.94	9.03	13.38	5.19	2.38333	9.2	1.94865	6.07e-06	0.000162131
BC1G_02551	BCIN_02g01960	gun5	Endoglucanase-5	13.51	13.02	11.15	21.38	42.18	18.08	12.56	27.2133	1.11548	0.00301152	0.0190507
BC1G_07822	BCIN_08g02110	celB	Endoglucanase B	3.65	5.75	4.54	14.78	16.84	10.19	4.64667	13.9367	1.58462	2.72e-07	1.21e-05
Hemicellulases
BC1G_07768	BCIN_15g01030	axeA	Probable acetylxylan esterase A	7.55	11.41	10.85	25.26	36.4	30.85	9.93667	30.8367	1.63381	3.44e-09	3.1e-07
BC1G_00576	BCIN_03g03480	xynF3	Endo-1,4-beta-xylanase F3	133.18	144.1	120.24	359.21	246.17	147.9	132.507	251.093	0.922159	0.00943425	0.044549
BC1G_01778	BCIN_05g06020	xlnA	Endo-1,4-beta-xylanase	4.74	6.32	7.77	5.64	9.18	8.48	6.27667	7.76667	0.307297	0.4792	0.673643
BC1G_03590	BCIN_12g00090	xlnB	Probable endo-1,4-beta-xylanase B	0.8	1.16	0.55	1.7	2.11	0.91	0.836667	1.57333	0.911099	0.0958369	0.231142
BC1G_04994	BCIN_13g03950	abfB	Probable alpha-N-arabinofuranosidase B	2.91	5.29	3.94	24.62	40.53	15.06	4.04667	26.7367	2.72401	2.21e-12	3.74e-10
BC1G_08372	BCIN_08g00890	abfA	Alpha-N-arabinofuranosidase A	3.68	5.31	4.83	9.13	11.85	9.32	4.60667	10.1	1.13256	3.43e-05	0.000649696
BC1G_10322	BCIN_02g07700	abnA	Arabinan endo-1,5-alpha-L-arabinosidase A	20.12	31.64	19.16	28.95	45.66	16.17	23.64	30.26	0.356182	0.490912	0.682746
BC1G_10341	BCIN_02g07520	manA	Mannan endo-1,4-beta-mannosidase	24.79	29.57	19.7	22.18	31.5	19.08	24.6867	24.2533	-0.025549	0.636428	0.788159
BC1G_00239	BCIN_01g07260	xylB	Xylosidase/arabinosidase	10.02	10.66	10.05	13.81	11.69	12.8	10.2433	12.7667	0.317697	0.312482	0.514366
BC1G_10797	BCIN_08g00060	xylB	Xylosidase/arabinosidase	17.59	19.73	18.56	14.43	11.11	14.21	18.6267	13.25	-0.491377	0.00289443	0.0184741
BC1G_00594	BCIN_03g03630	xegA	Xyloglucan-specific endo-beta-1,4-glucanase A	59.98	45.49	49.21	51.36	74.95	84.44	51.56	70.25	0.446246	0.203916	0.387296
BC1G_00417	BCIN_01g05940	faeA	Probable feruloyl esterase A	35.29	41.52	40.07	43.02	54.82	44	38.96	47.28	0.279236	0.417918	0.6199
BC1G_09495	BCIN_09g05740	faeB-2	Probable feruloyl esterase B-2	33.52	33.35	34.93	38.5	23.83	24.62	33.9333	28.9833	-0.22748	0.159353	0.326671
BC1G_08975	BCIN_08g05870	afcA	Alpha-fucosidase A	4.68	7.37	6.66	18.53	26.69	17.53	6.23667	20.9167	1.74581	2.53e-09	2.31e-07
Amylases, dextrinases and other saccharide degrading enzymes
BC1G_04496	BCIN_04g02660	Ycr2	Uncharacterized family 31 glucosidase ORF2 (Fragment）	4.49	6.02	6.12	11.95	10.86	10.46	5.54333	11.09	1.00043	7.44e-05	0.00117561
BC1G_06463	BCIN_13g05110	amy3	Alpha-amylase A type-3	474.28	540.16	508.54	705.75	941.53	844.91	507.66	830.73	0.710517	0.0037304	0.0222157
BC1G_08053	BCIN_02g05690	O16G	Oligo-1,6-glucosidase	26.22	37.09	30.04	60.26	63.67	36.16	31.1167	53.3633	0.778161	0.0157163	0.0641159
BC1G_08755	BCIN_12g03390	amyG	Glucoamylase P	4.41	3.89	3.41	5.66	5.79	3.55	3.90333	5	0.357221	0.406634	0.609118
BC1G_13488	BCIN_16g04060	EglX	Probable endo-1,3(4)-beta-glucanase NFIA_089530	27.4	21.42	15.83	9.37	6.85	4.88	21.55	7.03333	-1.61541	5.89e-08	3.38e-06
BC1G_03567	BCIN_12g00300	BgalA	Probable beta-galactosidase A	3.4	4.46	4.66	13.33	24.86	15.46	4.17333	17.8833	2.09934	1.55e-11	2.32e-09
BC1G_03859	BCIN_04g06020	BgalC	Probable beta-galactosidase C	2.15	1.73	1.96	5.28	4.5	5.04	1.94667	4.94	1.34351	2.21e-07	1.02e-05
BC1G_06897	BCIN_02g08960	Bgal	Beta-galactosidase	6.11	8.24	8.4	9.83	14.24	12.94	7.58333	12.3367	0.702049	0.0145922	0.0607284
Table S2.3.2. Genes involved in the metabolic pathways related to acetyl-CoA biosynthesis and transportation were identified in B.cinerea TB-31 and Bchda1-OE-X24.
B.cinerea B05.10 Gene ID		Protein name	Annotation
Old_locus_tag	New_locus_tag			TB-31-1_fpkm	TB-31-2_fpkm	TB-31-3_fpkm	Bchda1-OE-X24-1_fpkm	Bchda1-OE-X24-2_fpkm	Bchda1-OE-X24-3_fpkm	TB-31_mean	Bchda1-OE-X24_mean	log2(fc)	PValue	FDR
Glycolysis
BC1G_05322	BCIN_01g09990	HXK	Hexokinase-1	17.11	13.43	19.32	20.65	21.46	45.86	16.62	29.3233	0.819129	0.0315303	0.105991
BC1G_12086	BCIN_11g05700		Hexokinase	291.93	220.71	240.08	258.29	221.78	159.96	250.907	213.343	-0.233974	0.173113	0.346747
BC1G_12178	BCIN_09g04170		Glucokinase	26.41	20.87	32.23	35.21	24.47	19.66	26.5033	26.4467	-0.00308792	0.68256	0.820549
BC1G_15108	BCIN_15g04970	GPI	Glucose-6-phosphate isomerase	97.25	76.97	95.58	172.99	87.15	131.07	89.9333	130.403	0.536053	0.109413	0.252657
BC1G_10994	BCIN_08g06300	PFK	6-phosphofructokinase subunit alpha	19.81	20.29	28.03	47.26	15.02	35.66	22.71	32.6467	0.523608	0.255597	0.451957
BC1G_08819	BCIN_08g04730	FBP1	Fructose-1,6-bisphosphatase	109.92	116.34	115.11	170.32	125.4	164.26	113.79	153.327	0.430235	0.111363	0.25539
BC1G_04836	BCIN_11g03090	ALDOA	Fructose-bisphosphate aldolase	565.09	598.54	592.76	831.15	570.16	515.21	585.463	638.84	0.125876	0.957735	0.977096
BC1G_08882	BCIN_08g05220	TPI	Triosephosphate isomerase	384.78	279.56	318.6	361.03	332.96	267.09	327.647	320.36	-0.0324468	0.528009	0.711726
BC1G_11968	BCIN_15g02120	GAPDH	Glyceraldehyde-3-phosphate dehydrogenase	3959.84	3024.01	3152.78	3149.81	2062.27	1586.95	3378.88	2266.34	-0.576177	0.0156661	0.0639765
BC1G_09523	BCIN_09g05560		Glyceraldehyde-3-phosphate dehydrogenase	5.55	5.11	3.9	1.68	2.4	1.51	4.85333	1.86333	-1.38109	2.67e-06	8.49e-05
BC1G_12890	BCIN_11g06240	PGK	Phosphoglycerate kinase	724.49	573.58	596.97	416.99	349.71	245.17	631.68	337.29	-0.905204	8.72e-05	0.00133427
BC1G_07689	BCIN_09g06520	PGAM	phosphoglycerate mutase	44.14	39.35	47.61	62.32	39.38	58.28	43.7	53.3267	0.287224	0.469686	0.665102
BC1G_03837	BCIN_04g05860		phosphoglycerate mutase	57.04	43.46	42.77	49.17	21.24	29.2	47.7567	33.2033	-0.524374	0.0402657	0.125833
BC1G_11392	BCIN_02g06270		2,3-bisphosphoglycerate-independent phosphoglycerate mutase	181.91	143.14	154.66	161.79	133.15	112.32	159.903	135.753	-0.236212	0.130035	0.284997
BC1G_00350	BCIN_01g06450	ENO	Enolase	2583.09	2220.13	2416.32	2012.74	1786.47	1341.46	2406.51	1713.56	-0.489951	0.00902531	0.0429051
BC1G_05305	BCIN_01g10100	PYK	Pyruvate kinase	1122.81	993.86	913.26	789.79	721.65	470.15	1009.98	660.53	-0.612626	0.00544661	0.0294859
Pentose phosphate pathway
BC1G_08348	BCIN_01g09650	G6PD	Glucose-6-phosphate 1-dehydrogenase	223.38	197.66	212.37	241.26	282.15	213.68	211.137	245.697	0.218701	0.610203	0.771514
BC1G_02744	BCIN_07g02610	PGD	6-phosphogluconate dehydrogenase, decarboxylating 2	1091.25	922.43	876.5	1142.04	824	663.91	963.393	876.65	-0.136124	0.341957	0.544678
BC1G_03095	BCIN_12g02170	RPI	Ribose-5-phosphate isomerase	85.3	82.5	77.66	88.82	69.93	65.01	81.82	74.5867	-0.133536	0.242329	0.435553
BC1G_02529	BCIN_02g02110	RPE	Ribulose-phosphate 3-epimerase	163.94	124.47	134.99	99.58	79.37	59.21	141.133	79.3867	-0.83009	0.000290849	0.00343013
BC1G_00555	BCIN_03g03360	TAL	Transaldolase	421.44	407.7	424.29	492.33	346.64	297.32	417.81	378.763	-0.14155	0.286641	0.48674
BC1G_00585	BCIN_03g03550	TKT	Transketolase	7.1	8.99	9.07	7.97	9.03	6.22	8.38667	7.74	-0.115764	0.369939	0.572966
BC1G_08475	BCIN_14g01980		Probable transketolase	322.79	366.91	372.51	444.54	344.32	275.16	354.07	354.673	0.00245625	0.646389	0.794607
BC1G_01045	BCIN_06g00790	PRPS	Ribose-phosphate pyrophosphokinase 1	21.03	19.17	26.11	25.26	27.08	43.01	22.1033	31.7833	0.524006	0.120297	0.26969
BC1G_01835	BCIN_05g05580		Ribose-phosphate pyrophosphokinase 5	11.41	12.75	17.02	13.66	12.08	32.44	13.7267	19.3933	0.498579	0.288483	0.488629
BC1G_04262	BCIN_04g05060		Ribose-phosphate pyrophosphokinase 3	41.95	45.24	52.15	68.22	30.9	92.21	46.4467	63.7767	0.457454	0.320354	0.52236
TCA cycle
BC1G_02443	BCIN_02g02750	CS	Citrate synthase	555.2	446.36	445.13	692.27	585.02	470.02	482.23	582.437	0.27238	0.509341	0.696425
BC1G_05989	BCIN_13g02440	ACLY	Probable ATP-citrate synthase subunit 1	394.58	541.46	535.11	640.29	674.6	1258.14	490.383	857.677	0.806524	0.01671	0.0670975
BC1G_05991	BCIN_13g02430		Probable ATP-citrate synthase subunit 2	1382.94	1212.06	1211.96	1189.73	1809.69	1633.94	1268.99	1544.45	0.283419	0.468887	0.664362
BC1G_04169	BCIN_04g04360	ACO	Aconitate hydratase	12.27	19.45	19.41	25.69	22.58	43.39	17.0433	30.5533	0.842122	0.0134895	0.0576187
BC1G_04169	BCIN_04g04360		Probable aconitate hydratase 2	12.27	19.45	19.41	25.69	22.58	43.39	17.0433	30.5533	0.842122	0.0134895	0.0576187
BC1G_07285	BCIN_07g04280	IDH	Isocitrate dehydrogenase [NAD] subunit 2	224.58	208.23	193.15	213.07	247.9	189.07	208.653	216.68	0.054458	0.793418	0.888839
BC1G_00206	BCIN_01g07460		Isocitrate dehydrogenase [NAD] subunit 1	251.42	198.55	207.49	151.74	239.33	192.24	219.153	194.437	-0.17264	0.261647	0.459216
BC1G_12439	BCIN_05g01360	OGDH	2-oxoglutarate dehydrogenase	57.46	73.83	72.53	85.81	110.92	121.09	67.94	105.94	0.640914	0.0161156	0.0653227
BC1G_11376	BCIN_02g06400	DLDH	Dihydrolipoyl dehydrogenase	168.86	197.05	185.25	235.7	261.84	247.37	183.72	248.303	0.434595	0.0796824	0.203386
BC1G_11314	BCIN_02g06820	DLST	2-oxoglutarate dehydrogenase E2 component	345.98	301.86	293.92	289.32	307.38	189.33	313.92	262.01	-0.260775	0.146186	0.308961
BC1G_05074	BCIN_10g01530	SUCL	Probable succinyl-CoA ligase [GDP-forming] subunit alpha	529.12	387.88	422.53	259.63	334.2	204.64	446.51	266.157	-0.746417	0.00130276	0.010398
BC1G_07795	BCIN_15g01180	SDH	Probable succinate dehydrogenase [ubiquinone] flavoprotein subunit	411.33	317.02	411.28	409.59	295.99	481.59	379.877	395.723	0.058961	0.798053	0.891233
BC1G_12973	BCIN_09g03220	FH	Fumarate hydratase, mitochondrial	79.42	89.46	97.16	125.27	118.62	172.93	88.68	138.94	0.647781	0.013746	0.0584022
BC1G_07409	BCIN_12g05210	MDH	Malate dehydrogenase, mitochondrial	199.68	244.37	241.01	376.74	324.24	379.27	228.353	360.083	0.657063	0.00331973	0.020397
BC1G_10724	BCIN_16g04800		Malate dehydrogenase, mitochondrial	286.45	273.16	272.65	415.75	315.56	329.97	277.42	353.76	0.350699	0.249791	0.444773
Acetyl-CoA biosynthesis
BC1G_11347	BCIN_02g06580	PDC	Pyruvate decarboxylase	11.35	12.17	14.16	25.92	23.83	19.56	12.56	23.1033	0.879265	0.000424082	0.00450714
BC1G_06362	BCIN_13g05810	ALDH	Aldehyde dehydrogenase	385.34	430.56	399.79	528.28	514.22	356.03	405.23	466.177	0.202136	0.684341	0.822196
BC1G_02079	BCIN_03g01130		Aldehyde dehydrogenase	46.25	45.68	43.18	60.93	53.14	44.39	45.0367	52.82	0.229984	0.583531	0.753567
BC1G_07090	BCIN_09g02790	ACS	Acetyl-coenzyme A synthetase	45.4	50.37	45.76	58.83	60.19	57.19	47.1767	58.7367	0.316188	0.264731	0.463052
BC1G_02852	BCIN_07g01890	PDH	Pyruvate dehydrogenase E1 component subunit alpha	393.3	433.19	412.01	398.86	452.18	431.8	412.833	427.613	0.0507474	0.744881	0.857976
BC1G_08794	BCIN_08g04540		Pyruvate dehydrogenase E1 component subunit beta	106.9	159.31	153.88	184.34	186.53	226.81	140.03	199.227	0.508675	0.0717837	0.189017
BC1G_13687	BCIN_12g05730		Dihydrolipoyllysine-residue acetyltransferase component of pyruvate dehydrogenase complex	177.05	221.9	211.09	207.64	228.66	266.61	203.347	234.303	0.204436	0.640749	0.790993
BC1G_11376	BCIN_02g06400		Dihydrolipoyl dehydrogenase	168.86	197.05	185.25	235.7	261.84	247.37	183.72	248.303	0.434595	0.0796824	0.203386
Carnitine shuttle system
BC1G_14666	BCIN_06g07240	CRC	Mitochondrial carnitine carrier	43.48	44.86	44.25	46.85	42.96	39.3	44.1967	43.0367	-0.0383712	0.431699	0.63078
BC1G_14516	BCIN_03g07910	CAT	Mitochondrial carnitine O-acetyltransferase	64.92	52.75	54.02	81.87	104.21	82.38	57.23	89.4867	0.644901	0.0190089	0.073784
BC1G_02490	BCIN_02g02420	YAT	Putative carnitine O-acetyltransferase	7.99	11.92	10.84	15.3	13.8	16.33	10.25	15.1433	0.563059	0.0440536	0.133835
Peroxisomal beta-oxidation
BC1G_07557	BCIN_08g03980	ACL	Putative acyl-CoA synthetase YngI	6.29	5.99	6.59	13.07	9.91	11.32	6.29	11.4333	0.862114	0.000483478	0.00493517
BC1G_14541	BCIN_15g04320		Putative acyl-CoA synthetase YngI	0.8	1.13	0.73	1.22	2.17	1.55	0.886667	1.64667	0.893085	0.0418668	0.129503
BC1G_15689	BCIN_07g04170	ACSL	Long-chain-fatty-acid--CoA ligase 1	75.18	81.97	95.38	79.8	77.67	87.85	84.1767	81.7733	-0.0417899	0.413797	0.615097
BC1G_07013	BCIN_04g00760		Long chain acyl-CoA synthetase 7, peroxisomal	26.84	39.33	38.74	45.56	66.47	63.05	34.97	58.36	0.738862	0.0106605	0.0487838
BC1G_08482	BCIN_14g02030	ACOX	Peroxisomal acyl-coenzyme A oxidase 1	32.3	33.63	29.16	40.61	54.09	44.89	31.6967	46.53	0.55383	0.0439513	0.133727
BC1G_08167	BCIN_16g02260	ECI	Peroxisomal 3,2-trans-enoyl-CoA isomerase	105.13	111.7	101.31	86.44	107.7	76.44	106.047	90.1933	-0.233607	0.128456	0.283164
BC1G_10889	BCIN_16g03900		3,2-trans-enoyl-CoA isomerase	27.23	22.84	27.11	21.11	30.89	21.75	25.7267	24.5833	-0.065584	0.450818	0.64824
BC1G_13290	BCIN_01g04960	HADH	3-ketoacyl-CoA thiolase B, peroxisomal	6.72	6.74	7.41	8.06	7.27	10.25	6.95667	8.52667	0.293586	0.443242	0.641834
BC1G_03480	BCIN_12g00940		3-ketoacyl-CoA thiolase B, peroxisomal	43.85	56.04	50.5	84.78	113.09	90.93	50.13	96.2667	0.941362	0.000178767	0.00234588
BC1G_00632	BCIN_03g03940		3-ketoacyl-CoA thiolase, peroxisomal	152.53	136.47	117.48	113.71	119.78	78.11	135.493	103.867	-0.383489	0.0508961	0.147629
Mitochondrial beta-oxidation
BC1G_13535	BCIN_02g07220	ACAD	Acyl-CoA dehydrogenase	52.31	55.62	47.9	74.66	73.15	59.5	51.9433	69.1033	0.411817	0.15264	0.31751
BC1G_11641	BCIN_07g06070		Probable acyl-CoA dehydrogenase fadE25	19.64	17.43	15.9	18.15	19.61	10.45	17.6567	16.07	-0.135843	0.399303	0.602041
BC1G_02655	BCIN_07g03290		Acyl-CoA dehydrogenase fadE12	8.19	8.12	6.66	10.73	14.44	14.2	7.65667	13.1233	0.777346	0.00715075	0.035963
BC1G_09232	BCIN_16g03180		Acyl-CoA dehydrogenase family member 11	80.96	87.75	75.46	109.74	182.9	87.95	81.39	126.863	0.640352	0.0732469	0.191775
BC1G_14434	BCIN_06g04120	ACADL	Long-chain specific acyl-CoA dehydrogenase, mitochondrial	18.31	16.36	15.57	13.73	14.06	13.86	16.7467	13.8833	-0.27052	0.0631597	0.172796
BC1G_07476	BCIN_12g04690	ACADSB	Short/branched chain specific acyl-CoA dehydrogenase, mitochondrial	23.3	31.33	28.44	39.27	31.29	42.66	27.69	37.74	0.446729	0.124333	0.27667
BC1G_01837	BCIN_05g05560	ECH	Enoyl-CoA hydratase, mitochondrial	5.12	5.82	5.18	11.96	14.22	11.48	5.37333	12.5533	1.22418	2.01e-06	6.61e-05
BC1G_03078	BCIN_12g02080		Putative enoyl-CoA hydratase/isomerase yngF	9.84	11.8	9.63	19.08	21.19	20.14	10.4233	20.1367	0.950008	0.000163141	0.00218627
BC1G_00915	BCIN_03g05840		Probable enoyl-CoA hydratase, mitochondrial	68.63	58.15	53.4	75.81	61.91	53.96	60.06	63.8933	0.0892609	0.906708	0.951243
BC1G_11581	BCIN_15g05380		Enoyl-CoA hydratase, mitochondrial	257.45	248.39	223.21	270.53	202.71	202.88	243.017	225.373	-0.108738	0.293404	0.494115
BC1G_01675	BCIN_05g06820	HADH	3-hydroxyacyl-CoA dehydrogenase type-2	211.74	128.42	125.64	94.22	105.15	69.52	155.267	89.63	-0.792695	0.00214812	0.014962
Glyoxylate cycle
BC1G_13616	BCIN_09g01320	ICL	Isocitrate lyase	111.04	129.21	121.86	170.22	144.2	96.97	120.703	137.13	0.184079	0.76554	0.871726
BC1G_09443	BCIN_09g06110	MLS	Malate synthase, glyoxysomal	255.61	259.91	269.6	313.16	266.86	213.28	261.707	264.433	0.0149534	0.659064	0.803008
CoA biosynthesis
BC1G_01210	BCIN_06g01960	PANK	Pantothenate kinase	15.91	18.45	21.59	39.68	23.17	57.86	18.65	40.2367	1.10934	0.00143309	0.0111759
BC1G_02344	BCIN_06g04980	PPCS	Phosphopantothenate--cysteine ligase CAB2	22.02	25.09	26.97	53.77	61.16	58.34	24.6933	57.7567	1.22587	1.1e-08	8.44e-07
BC1G_09191	BCIN_16g02860	DCAK	Dephospho-CoA kinase CAB5	22.72	21.34	16.2	26.21	30.27	16.24	20.0867	24.24	0.271152	0.589656	0.758508
Fatty acid biosynthesis
BC1G_14055	BCIN_01g00440	FASN	Fatty acid synthase subunit alpha	26.75	34.72	36.77	33.38	41.81	116.13	32.7467	63.7733	0.961605	0.0330341	0.109426
BC1G_14051	BCIN_01g00450		Fatty acid synthase subunit beta	35.2	40.65	42.25	37.31	46.67	129.36	39.3667	71.1133	0.853146	0.0609308	0.168233
BC1G_13188	BCIN_04g00210	MCAT	[acyl-carrier-protein] S-malonyltransferase	6.62	7.55	7.21	10.02	7.55	10.42	7.12667	9.33	0.38865	0.235553	0.427792
Table S2.3.3. The genes involved in the ABA biosynthesis pathway were identified in B.cinerea TB-31 and Bchda1-OE-X24.
B.cinerea B05.10 Gene ID		Protein name	Annotation
Old_locus_tag	New_locus_tag			TB-31-1_fpkm	TB-31-2_fpkm	TB-31-3_fpkm	Bchda1-OE-X24-1_fpkm	Bchda1-OE-X24-2_fpkm	Bchda1-OE-X24-3_fpkm	TB-31_mean	Bchda1-OE-X24_mean	log2(fc)	PValue	FDR
BC1G_02275	BCIN_06g05400	ACAT	Acetyl-CoA acetyltransferase	19.44	22.49	23.29	38.79	37.14	30.61	21.74	35.5133	0.708009	0.00443345	0.0253334
BC1G_08841	BCIN_08g04860	AACS	Acetoacetyl-CoA synthetase	4.17	5.11	5.19	8.06	4.94	14.72	4.82333	9.24	0.937862	0.0208431	0.078862
BC1G_02728	BCIN_07g02750		Acetoacetyl-CoA synthetase	7.05	10.97	12.55	19.36	24.94	27.08	10.19	23.7933	1.2234	2.37e-05	0.000479552
BC1G_09652	BCIN_11g00330	HMGCS	Hydroxymethylglutaryl-CoA synthase	457.59	597.69	626.17	298.7	389.13	606.27	560.483	431.367	-0.377757	0.0812298	0.206064
BC1G_01518	BCIN_05g03150	HMGCR	3-hydroxy-3-methylglutaryl-coenzyme A reductase	285.9	347.12	336.93	306.32	416.1	574.58	323.317	432.333	0.419196	0.235984	0.428133
BC1G_01429	BCIN_05g03770	MVK	Mevalonate kinase	64.85	80.2	77.2	76.33	94.45	80.99	74.0833	83.9233	0.179923	0.833774	0.913685
BC1G_07491	BCIN_12g04570	PMVK	Probable phosphomevalonate kinase	37.81	51.13	49.66	56.17	55.51	63.21	46.2	58.2967	0.335521	0.258744	0.455641
BC1G_14194	BCIN_04g01890	MVD	Diphosphomevalonate decarboxylase	302.51	279.22	268.99	371.09	298.78	275.76	283.573	315.21	0.152591	0.859358	0.929234
BC1G_11480	BCIN_12g01780	IDI	Isopentenyl-diphosphate Delta-isomerase	154.67	142.64	161.25	172.14	140.58	170.61	152.853	161.11	0.075898	0.834754	0.914258
BC1G_09058	BCIN_14g01170	GGS1	geranylgeranyl pyrophosphate synthase	44.5	45.18	44.6	34.75	39.24	36.47	44.76	36.82	-0.28172	0.0391311	0.123251
BC1G_02940	BCIN_15g03120	FPPS	Farnesyl pyrophosphate synthase	371.81	315.81	277.79	434.34	540.41	388.59	321.803	454.447	0.497932	0.111194	0.2551
BC1G_07529	BCIN_08g03830	ABA4	ABA4 protein	139.15	154.93	123.6	84.62	125.53	79.95	139.227	96.7	-0.525848	0.0146505	0.0609499
BC1G_07530	BCIN_08g03840	ABA2	cytochrome P450 monoxygenase	646.87	716.75	635.87	557.78	838.26	611.35	666.497	669.13	0.00568887	0.670908	0.811802
BC1G_07531	BCIN_08g03850	ABA1	cytochrome P450 monooxygenase	1853.98	1910.89	1462.67	1104	1093.65	788.54	1742.51	995.397	-0.807826	0.000133224	0.00184941
BC1G_07534	BCIN_08g03880	ABA3	ABA3 protein	503.58	569.75	437.38	339.43	316.48	251.66	503.57	302.523	-0.735146	0.000169157	0.00224992

## Sheet: Table S2.4
Table S2.4.1. Genes involved in sugar transporters and permeases were identified in B.cinerea TB-31 and Bcdim5-OE-X8.
B.cinerea B05.10 Gene ID		Protein name	Annotation
Old_locus_tag	New_locus_tag
Sugar transporters and permeases				TB-31-1_fpkm	TB-31-2_fpkm	TB-31-3_fpkm	Bcdim5-OE-X8-1_fpkm	Bcdim5-OE-X8-2_fpkm	Bcdim5-OE-X8-3_fpkm	TB-31_mean	Bcdim5-OE-X8_mean	log2(fc)	PValue	FDR
BC1G_03115	BCIN_12g02300	rco-3	Probable glucose transporter rco-3	150.46	194.44	157.81	175.27	142.12	195.71	167.57	171.033	0.0295136	0.45552	0.618113
BC1G_16090	BCIN_05g04880	rco-3	Probable glucose transporter rco-3	44.23	65.78	58.8	59.97	60.72	68.72	56.27	63.1367	0.166112	0.857243	0.919416
BC1G_08389	BCIN_08g00740	HGT1	High-affinity glucose transporter	197.2	133.95	122.39	90.01	127.82	109.42	151.18	109.083	-0.470837	0.000783934	0.00347825
BC1G_11623	BCIN_07g05910	HGT1	High-affinity glucose transporter	2.4	4.66	3.6	2.28	4.61	2.52	3.55333	3.13667	-0.179941	0.241122	0.394513
BC1G_03049	BCIN_12g01880	gluP	Glucose/galactose transporter	10.07	11.15	21.34	21.38	13.85	13.53	14.1867	16.2533	0.1962	0.789411	0.875639
BC1G_05567	BCIN_02g00620	LAC12	Lactose permease	13.71	18.34	15.84	16.4	16.53	18.59	15.9633	17.1733	0.105408	0.794342	0.878735
BC1G_05673	BCIN_06g03640	LAC12	Lactose permease	4.38	4.91	4.46	3.43	4.29	3.62	4.58333	3.78	-0.278011	0.0190417	0.0529099
BC1G_06896	BCIN_02g08950	LAC12	Lactose permease	15.24	14.64	10.78	9.17	8.8	7.89	13.5533	8.62	-0.652888	4.06e-06	3.41e-05
BC1G_12189	BCIN_01g03940	LAC12	Lactose permease	2.69	3.5	3.7	2.64	3.27	2.92	3.29667	2.94333	-0.163557	0.173235	0.307292
BC1G_05864	BCIN_01g01320	MAL11	General alpha-glucoside permease	9.81	12.56	13.81	12.64	15.12	12.64	12.06	13.4667	0.159163	0.909094	0.948432
BC1G_08702	BCIN_12g03830	MAL11	General alpha-glucoside permease	100.94	119.81	102.48	93.79	103.09	77.71	107.743	91.53	-0.235282	0.00606633	0.0201199
BC1G_05489	BCIN_02g00080	MAL61	Maltose permease MAL61	12.8	16.34	11.17	10.15	12.84	12.27	13.4367	11.7533	-0.193105	0.0485487	0.113343
BC1G_03637	BCIN_10g04830	sut1	General alpha-glucoside permease	82.6	76.44	60.46	50.89	61.25	57.48	73.1667	56.54	-0.371915	0.00050787	0.00240177
BC1G_10946	BCIN_16g03430	sut1	General alpha-glucoside permease	22.6	35.47	29.13	26.7	25.87	29.12	29.0667	27.23	-0.0941687	0.132601	0.250006
Beta-glucosidases
BC1G_07110	BCIN_09g02640	bglG	Probable beta-glucosidase G	4.74	5.94	6.02	4.43	4.99	5.2	5.56667	4.87333	-0.191905	0.0424387	0.101692
BC1G_07622	BCIN_09g06990	bglM	Probable beta-glucosidase M	6.54	8.61	6.51	5.87	7.65	6.43	7.22	6.65	-0.118644	0.106274	0.21053
BC1G_10231	BCIN_10g05630	bglF	Probable beta-glucosidase F	11.68	16.97	16.23	17.48	20.18	19.47	14.96	19.0433	0.348176	0.165555	0.296388
BC1G_10877	BCIN_16g03980	bgl11	Beta-glucosidase 11	20.07	35.79	28.79	25.28	48.01	25.3	28.2167	32.8633	0.219931	0.731941	0.834989
BC1G_11255	BCIN_07g06700	bgl1B	Beta-glucosidase 1B	1.62	1.9	1.72	1.31	2.27	2.46	1.74667	2.01333	0.204982	0.823971	0.897782
BC1G_14164	BCIN_15g02440	bglL	Probable beta-glucosidase L	2.35	3.42	3.01	3.32	3.11	2.55	2.92667	2.99333	0.0324945	0.599521	0.742698
BC1G_14786	BCIN_02g03090	bgl1A	Beta-glucosidase 1A	18.75	25.58	24.68	19.4	26.47	19.49	23.0033	21.7867	-0.0783974	0.174219	0.308856
Cellulolytic enzymes
BC1G_08989	BCIN_14g01700	cbhC	Probable 1,4-beta-D-glucan cellobiohydrolase C	9.63	16.36	9.01	11.41	11.81	9.27	11.6667	10.83	-0.107359	0.235622	0.387681
BC1G_10880	BCIN_16g03950	cbhB	Probable 1,4-beta-D-glucan cellobiohydrolase B	1.62	3.59	1.94	2.01	4.59	2.85	2.38333	3.15	0.402371	0.439265	0.603115
BC1G_02551	BCIN_02g01960	gun5	Endoglucanase-5	13.51	13.02	11.15	8.96	9.45	11.69	12.56	10.0333	-0.324035	0.00743925	0.0239257
BC1G_07822	BCIN_08g02110	celB	Endoglucanase B	3.65	5.75	4.54	4.63	3.86	5.78	4.64667	4.75667	0.0337548	0.607808	0.748941
Hemicellulases
BC1G_07768	BCIN_15g01030	axeA	Probable acetylxylan esterase A	7.55	11.41	10.85	9.78	14.72	11.03	9.93667	11.8433	0.253241	0.577665	0.725078
BC1G_00576	BCIN_03g03480	xynF3	Endo-1,4-beta-xylanase F3	133.18	144.1	120.24	127.46	121.12	107.27	132.507	118.617	-0.159758	0.020352	0.0557905
BC1G_01778	BCIN_05g06020	xlnA	Endo-1,4-beta-xylanase	4.74	6.32	7.77	6.98	5.93	6.58	6.27667	6.49667	0.0497011	0.651752	0.781099
BC1G_03590	BCIN_12g00090	xlnB	Probable endo-1,4-beta-xylanase B	0.8	1.16	0.55	0.69	0.54	0.37	0.836667	0.533333	-0.649615	0.103048	0.205394
BC1G_04994	BCIN_13g03950	abfB	Probable alpha-N-arabinofuranosidase B	2.91	5.29	3.94	4.04	7.92	5.04	4.04667	5.66667	0.485766	0.186429	0.325024
BC1G_08372	BCIN_08g00890	abfA	Alpha-N-arabinofuranosidase A	3.68	5.31	4.83	3.87	4.31	3.97	4.60667	4.05	-0.185801	0.069646	0.151197
BC1G_10322	BCIN_02g07700	abnA	Arabinan endo-1,5-alpha-L-arabinosidase A	20.12	31.64	19.16	18.13	23	19.19	23.64	20.1067	-0.233556	0.0452713	0.107322
BC1G_10341	BCIN_02g07520	manA	Mannan endo-1,4-beta-mannosidase	24.79	29.57	19.7	11.6	15.04	12.13	24.6867	12.9233	-0.933754	3.71e-10	7.92e-09
BC1G_00239	BCIN_01g07260	xylB	Xylosidase/arabinosidase	10.02	10.66	10.05	11.27	13.32	12.46	10.2433	12.35	0.269826	0.400087	0.566297
BC1G_10797	BCIN_08g00060	xylB	Xylosidase/arabinosidase	17.59	19.73	18.56	21.6	21.27	20.48	18.6267	21.1167	0.181013	0.773342	0.865084
BC1G_00594	BCIN_03g03630	xegA	Xyloglucan-specific endo-beta-1,4-glucanase A	59.98	45.49	49.21	31.03	22.32	21.42	51.56	24.9233	-1.04876	1.32e-11	3.78e-10
BC1G_00417	BCIN_01g05940	faeA	Probable feruloyl esterase A	35.29	41.52	40.07	40.53	48.03	41.82	38.96	43.46	0.157694	0.914122	0.949512
BC1G_09495	BCIN_09g05740	faeB-2	Probable feruloyl esterase B-2	33.52	33.35	34.93	38.67	35.25	33.1	33.9333	35.6733	0.0721429	0.569837	0.718996
BC1G_08975	BCIN_08g05870	afcA	Alpha-fucosidase A	4.68	7.37	6.66	6.34	9.03	7.34	6.23667	7.57	0.279518	0.470652	0.631566
Amylases, dextrinases and other saccharide degrading enzymes
BC1G_04496	BCIN_04g02660	Ycr2	Uncharacterized family 31 glucosidase ORF2 (Fragment）	4.49	6.02	6.12	6.2	7.51	6.44	5.54333	6.71667	0.276992	0.446517	0.60964
BC1G_06463	BCIN_13g05110	amy3	Alpha-amylase A type-3	474.28	540.16	508.54	670.3	691.11	663.46	507.66	674.957	0.410932	0.0146021	0.0424231
BC1G_08053	BCIN_02g05690	O16G	Oligo-1,6-glucosidase	26.22	37.09	30.04	39.78	51.47	45.56	31.1167	45.6033	0.551452	0.00691182	0.0225009
BC1G_08755	BCIN_12g03390	amyG	Glucoamylase P	4.41	3.89	3.41	2.92	2.91	3.19	3.90333	3.00667	-0.376542	0.0115452	0.0347981
BC1G_13488	BCIN_16g04060	EglX	Probable endo-1,3(4)-beta-glucanase NFIA_089530	27.4	21.42	15.83	9.05	7.37	9.95	21.55	8.79	-1.29375	5.09e-12	1.58e-10
BC1G_03567	BCIN_12g00300	BgalA	Probable beta-galactosidase A	3.4	4.46	4.66	4.33	5.27	4.76	4.17333	4.78667	0.197821	0.74379	0.844802
BC1G_03859	BCIN_04g06020	BgalC	Probable beta-galactosidase C	2.15	1.73	1.96	3.25	4.1	4.05	1.94667	3.8	0.964994	3.94e-05	0.00025774
BC1G_06897	BCIN_02g08960	Bgal	Beta-galactosidase	6.11	8.24	8.4	10.42	9.87	10.5	7.58333	10.2633	0.436595	0.0480841	0.112521
Table S2.4.2. Genes involved in the metabolic pathways related to acetyl-CoA biosynthesis and transportation were identified in B.cinerea TB-31 and Bcdim5-OE-X8.
B.cinerea B05.10 Gene ID		Protein name	Annotation
Old_locus_tag	New_locus_tag			TB-31-1_fpkm	TB-31-2_fpkm	TB-31-3_fpkm	Bcdim5-OE-X8-1_fpkm	Bcdim5-OE-X8-2_fpkm	Bcdim5-OE-X8-3_fpkm	TB-31_mean	Bcdim5-OE-X8_mean	log2(fc)	PValue	FDR
Glycolysis
BC1G_05322	BCIN_01g09990	HXK	Hexokinase-1	17.11	13.43	19.32	20.07	17.4	18.79	16.62	18.7533	0.174227	0.844507	0.911578
BC1G_12086	BCIN_11g05700		Hexokinase	291.93	220.71	240.08	226.13	227.55	245.56	250.907	233.08	-0.106326	0.0724514	0.155914
BC1G_12178	BCIN_09g04170		Glucokinase	26.41	20.87	32.23	28.06	24.79	27.7	26.5033	26.85	0.0187483	0.433089	0.597841
BC1G_15108	BCIN_15g04970	GPI	Glucose-6-phosphate isomerase	97.25	76.97	95.58	146.94	166.39	162.24	89.9333	158.523	0.817767	3.06e-07	3.37e-06
BC1G_10994	BCIN_08g06300	PFK	6-phosphofructokinase subunit alpha	19.81	20.29	28.03	53.83	54.85	56.92	22.71	55.2	1.28134	1.44e-15	8.55e-14
BC1G_08819	BCIN_08g04730	FBP1	Fructose-1,6-bisphosphatase	109.92	116.34	115.11	152.32	147.67	154.45	113.79	151.48	0.412754	0.0162055	0.0463737
BC1G_04836	BCIN_11g03090	ALDOA	Fructose-bisphosphate aldolase	565.09	598.54	592.76	673.17	659.64	684.54	585.463	672.45	0.199848	0.606535	0.748621
BC1G_08882	BCIN_08g05220	TPI	Triosephosphate isomerase	384.78	279.56	318.6	275.79	296.92	310.09	327.647	294.267	-0.155017	0.0291532	0.0747243
BC1G_11968	BCIN_15g02120	GAPDH	Glyceraldehyde-3-phosphate dehydrogenase	3959.84	3024.01	3152.78	3175.13	2923	3449.9	3378.88	3182.68	-0.0863031	0.107843	0.212654
BC1G_09523	BCIN_09g05560		Glyceraldehyde-3-phosphate dehydrogenase	5.55	5.11	3.9	2.76	2.32	1.9	4.85333	2.32667	-1.06071	4.88e-07	5.09e-06
BC1G_12890	BCIN_11g06240	PGK	Phosphoglycerate kinase	724.49	573.58	596.97	369.94	412.76	404.56	631.68	395.753	-0.674592	1.77e-09	3.19e-08
BC1G_07689	BCIN_09g06520	PGAM	phosphoglycerate mutase	44.14	39.35	47.61	53.8	57.42	59.13	43.7	56.7833	0.377834	0.0770993	0.1638
BC1G_03837	BCIN_04g05860		phosphoglycerate mutase	57.04	43.46	42.77	42.01	50.21	43.01	47.7567	45.0767	-0.0833213	0.151963	0.277904
BC1G_11392	BCIN_02g06270		2,3-bisphosphoglycerate-independent phosphoglycerate mutase	181.91	143.14	154.66	176.95	164.53	198.4	159.903	179.96	0.170476	0.875937	0.930891
BC1G_00350	BCIN_01g06450	ENO	Enolase	2583.09	2220.13	2416.32	2111.26	1941.18	2254.57	2406.51	2102.34	-0.194951	0.00744133	0.023926
BC1G_05305	BCIN_01g10100	PYK	Pyruvate kinase	1122.81	993.86	913.26	861.34	763.99	909.81	1009.98	845.047	-0.257219	0.00327757	0.0119513
Pentose phosphate pathway
BC1G_08348	BCIN_01g09650	G6PD	Glucose-6-phosphate 1-dehydrogenase	223.38	197.66	212.37	226.43	208.96	248.17	211.137	227.853	0.109928	0.777909	0.868261
BC1G_02744	BCIN_07g02610	PGD	6-phosphogluconate dehydrogenase, decarboxylating 2	1091.25	922.43	876.5	892.91	914	915.82	963.393	907.577	-0.0861054	0.103218	0.205664
BC1G_03095	BCIN_12g02170	RPI	Ribose-5-phosphate isomerase	85.3	82.5	77.66	91	92.31	99.35	81.82	94.22	0.20358	0.64173	0.772698
BC1G_02529	BCIN_02g02110	RPE	Ribulose-phosphate 3-epimerase	163.94	124.47	134.99	86.62	96.12	93.34	141.133	92.0267	-0.616935	1.04e-07	1.28e-06
BC1G_00555	BCIN_03g03360	TAL	Transaldolase	421.44	407.7	424.29	361.66	345.86	376.76	417.81	361.427	-0.209144	0.00177482	0.00703651
BC1G_00585	BCIN_03g03550	TKT	Transketolase	7.1	8.99	9.07	5.66	7.62	6.41	8.38667	6.56333	-0.353669	0.00305829	0.0112579
BC1G_08475	BCIN_14g01980		Probable transketolase	322.79	366.91	372.51	360.68	316.29	364.3	354.07	347.09	-0.0287248	0.155231	0.282373
BC1G_01045	BCIN_06g00790	PRPS	Ribose-phosphate pyrophosphokinase 1	21.03	19.17	26.11	25.89	20.36	24.04	22.1033	23.43	0.084093	0.718774	0.827701
BC1G_01835	BCIN_05g05580		Ribose-phosphate pyrophosphokinase 5	11.41	12.75	17.02	18.17	16.17	16.13	13.7267	16.8233	0.293482	0.338129	0.50372
BC1G_04262	BCIN_04g05060		Ribose-phosphate pyrophosphokinase 3	41.95	45.24	52.15	69.01	65.87	62.35	46.4467	65.7433	0.50127	0.00455358	0.0157381
TCA cycle
BC1G_02443	BCIN_02g02750	CS	Citrate synthase	555.2	446.36	445.13	434.69	451.78	414.71	482.23	433.727	-0.152935	0.0271939	0.0704704
BC1G_05989	BCIN_13g02440	ACLY	Probable ATP-citrate synthase subunit 1	394.58	541.46	535.11	661.47	627.32	637.41	490.383	642.067	0.388813	0.0593204	0.133276
BC1G_05991	BCIN_13g02430		Probable ATP-citrate synthase subunit 2	1382.94	1212.06	1211.96	1157.83	1166.98	1114.49	1268.99	1146.43	-0.146524	0.0162777	0.0465581
BC1G_04169	BCIN_04g04360	ACO	Aconitate hydratase	12.27	19.45	19.41	23.13	20.34	22.68	17.0433	22.05	0.371571	0.158612	0.28645
BC1G_04169	BCIN_04g04360		Probable aconitate hydratase 2	12.27	19.45	19.41	23.13	20.34	22.68	17.0433	22.05	0.371571	0.158612	0.28645
BC1G_07285	BCIN_07g04280	IDH	Isocitrate dehydrogenase [NAD] subunit 2	224.58	208.23	193.15	191.4	186.74	190.89	208.653	189.677	-0.137566	0.0215637	0.0584953
BC1G_00206	BCIN_01g07460		Isocitrate dehydrogenase [NAD] subunit 1	251.42	198.55	207.49	179.28	166.8	169.01	219.153	171.697	-0.352079	0.000298019	0.00150871
BC1G_12439	BCIN_05g01360	OGDH	2-oxoglutarate dehydrogenase	57.46	73.83	72.53	88.02	81.93	95.26	67.94	88.4033	0.37984	0.0662757	0.145721
BC1G_11376	BCIN_02g06400	DLDH	Dihydrolipoyl dehydrogenase	168.86	197.05	185.25	209.14	196.35	214.36	183.72	206.617	0.169448	0.819964	0.894988
BC1G_11314	BCIN_02g06820	DLST	2-oxoglutarate dehydrogenase E2 component	345.98	301.86	293.92	204.32	216.54	192.22	313.92	204.36	-0.619284	2.5e-09	4.37e-08
BC1G_05074	BCIN_10g01530	SUCL	Probable succinyl-CoA ligase [GDP-forming] subunit alpha	529.12	387.88	422.53	253.23	247.46	241.22	446.51	247.303	-0.852411	6.58e-12	1.99e-10
BC1G_07795	BCIN_15g01180	SDH	Probable succinate dehydrogenase [ubiquinone] flavoprotein subunit	411.33	317.02	411.28	358.16	274.1	219.69	379.877	283.983	-0.419725	0.00125604	0.00522319
BC1G_12973	BCIN_09g03220	FH	Fumarate hydratase, mitochondrial	79.42	89.46	97.16	101.01	94.88	106.49	88.68	100.793	0.18472	0.724523	0.831105
BC1G_07409	BCIN_12g05210	MDH	Malate dehydrogenase, mitochondrial	199.68	244.37	241.01	262.93	260.68	260.19	228.353	261.267	0.194255	0.655117	0.783606
BC1G_10724	BCIN_16g04800		Malate dehydrogenase, mitochondrial	286.45	273.16	272.65	356.64	353.49	377.2	277.42	362.443	0.385684	0.0407495	0.0983318
Acetyl-CoA biosynthesis
BC1G_11347	BCIN_02g06580	PDC	Pyruvate decarboxylase	11.35	12.17	14.16	12.11	13.31	13.41	12.56	12.9433	0.0433727	0.486551	0.646104
BC1G_06362	BCIN_13g05810	ALDH	Aldehyde dehydrogenase	385.34	430.56	399.79	389.49	351.35	438.91	405.23	393.25	-0.0432942	0.140821	0.261926
BC1G_02079	BCIN_03g01130		Aldehyde dehydrogenase	46.25	45.68	43.18	48.84	49.07	53.51	45.0367	50.4733	0.164421	0.883168	0.934931
BC1G_07090	BCIN_09g02790	ACS	Acetyl-coenzyme A synthetase	45.4	50.37	45.76	43.79	45.91	45.64	47.1767	45.1133	-0.0645196	0.0733922	0.157712
BC1G_02852	BCIN_07g01890	PDH	Pyruvate dehydrogenase E1 component subunit alpha	393.3	433.19	412.01	366.38	343.52	357.46	412.833	355.787	-0.214547	0.0013193	0.00545222
BC1G_08794	BCIN_08g04540		Pyruvate dehydrogenase E1 component subunit beta	106.9	159.31	153.88	158.91	133.95	147.29	140.03	146.717	0.0672968	0.639192	0.770745
BC1G_13687	BCIN_12g05730		Dihydrolipoyllysine-residue acetyltransferase component of pyruvate dehydrogenase complex	177.05	221.9	211.09	187.65	167.53	176.94	203.347	177.373	-0.197152	0.00633235	0.0209154
BC1G_11376	BCIN_02g06400		Dihydrolipoyl dehydrogenase	168.86	197.05	185.25	209.14	196.35	214.36	183.72	206.617	0.169448	0.819964	0.894988
Carnitine shuttle system
BC1G_14666	BCIN_06g07240	CRC	Mitochondrial carnitine carrier	43.48	44.86	44.25	44.73	50.35	48.08	44.1967	47.72	0.110656	0.775366	0.866148
BC1G_14516	BCIN_03g07910	CAT	Mitochondrial carnitine O-acetyltransferase	64.92	52.75	54.02	71.62	71.31	79.25	57.23	74.06	0.371923	0.10778	0.21259
BC1G_02490	BCIN_02g02420	YAT	Putative carnitine O-acetyltransferase	7.99	11.92	10.84	14.01	12.96	15.69	10.25	14.22	0.472298	0.0408609	0.0985807
Peroxisomal beta-oxidation
BC1G_07557	BCIN_08g03980	ACL	Putative acyl-CoA synthetase YngI	6.29	5.99	6.59	11.13	15.45	12.49	6.29	13.0233	1.04997	2.95e-08	4.09e-07
BC1G_14541	BCIN_15g04320		Putative acyl-CoA synthetase YngI	0.8	1.13	0.73	0.62	1.01	1	0.886667	0.876667	-0.0163634	0.653463	0.782368
BC1G_15689	BCIN_07g04170	ACSL	Long-chain-fatty-acid--CoA ligase 1	75.18	81.97	95.38	113.45	105.55	118.1	84.1767	112.367	0.416722	0.0276637	0.0715176
BC1G_07013	BCIN_04g00760		Long chain acyl-CoA synthetase 7, peroxisomal	26.84	39.33	38.74	46.69	47.48	49.81	34.97	47.9933	0.456716	0.0292596	0.0749489
BC1G_08482	BCIN_14g02030	ACOX	Peroxisomal acyl-coenzyme A oxidase 1	32.3	33.63	29.16	36.04	38.45	33.61	31.6967	36.0333	0.185001	0.768792	0.862016
BC1G_08167	BCIN_16g02260	ECI	Peroxisomal 3,2-trans-enoyl-CoA isomerase	105.13	111.7	101.31	64.5	90.24	61.1	106.047	71.9467	-0.5597	4.36e-06	3.62e-05
BC1G_10889	BCIN_16g03900		3,2-trans-enoyl-CoA isomerase	27.23	22.84	27.11	22.07	22.94	24.14	25.7267	23.05	-0.158498	0.0377312	0.0920478
BC1G_13290	BCIN_01g04960	HADH	3-ketoacyl-CoA thiolase B, peroxisomal	6.72	6.74	7.41	10.03	9.08	10.06	6.95667	9.72333	0.483055	0.0409236	0.098617
BC1G_03480	BCIN_12g00940		3-ketoacyl-CoA thiolase B, peroxisomal	43.85	56.04	50.5	55.36	58.61	60.12	50.13	58.03	0.211125	0.598225	0.741946
BC1G_00632	BCIN_03g03940		3-ketoacyl-CoA thiolase, peroxisomal	152.53	136.47	117.48	96.94	107.57	96.99	135.493	100.5	-0.431026	3.35e-05	0.000224429
Mitochondrial beta-oxidation
BC1G_13535	BCIN_02g07220	ACAD	Acyl-CoA dehydrogenase	52.31	55.62	47.9	59.56	67.46	65.17	51.9433	64.0633	0.30256	0.216412	0.363862
BC1G_11641	BCIN_07g06070		Probable acyl-CoA dehydrogenase fadE25	19.64	17.43	15.9	17.89	20.7	17.95	17.6567	18.8467	0.0940964	0.721756	0.829303
BC1G_02655	BCIN_07g03290		Acyl-CoA dehydrogenase fadE12	8.19	8.12	6.66	9.03	10.06	10.65	7.65667	9.91333	0.372654	0.195468	0.337447
BC1G_09232	BCIN_16g03180		Acyl-CoA dehydrogenase family member 11	80.96	87.75	75.46	56.45	73.9	65.82	81.39	65.39	-0.315782	0.000714668	0.00321132
BC1G_14434	BCIN_06g04120	ACADL	Long-chain specific acyl-CoA dehydrogenase, mitochondrial	18.31	16.36	15.57	14.28	15.02	14.46	16.7467	14.5867	-0.199224	0.0181456	0.050834
BC1G_07476	BCIN_12g04690	ACADSB	Short/branched chain specific acyl-CoA dehydrogenase, mitochondrial	23.3	31.33	28.44	45.95	50.89	51.31	27.69	49.3833	0.834659	4.94e-07	5.13e-06
BC1G_01837	BCIN_05g05560	ECH	Enoyl-CoA hydratase, mitochondrial	5.12	5.82	5.18	5.72	7.52	6.01	5.37333	6.41667	0.256007	0.560604	0.711216
BC1G_03078	BCIN_12g02080		Putative enoyl-CoA hydratase/isomerase yngF	9.84	11.8	9.63	12.92	14.68	13.35	10.4233	13.65	0.389084	0.155406	0.282595
BC1G_00915	BCIN_03g05840		Probable enoyl-CoA hydratase, mitochondrial	68.63	58.15	53.4	64.84	76.62	61.8	60.06	67.7533	0.173887	0.873587	0.929878
BC1G_11581	BCIN_15g05380		Enoyl-CoA hydratase, mitochondrial	257.45	248.39	223.21	290.73	345.89	302.59	243.017	313.07	0.36543	0.0912312	0.18649
BC1G_01675	BCIN_05g06820	HADH	3-hydroxyacyl-CoA dehydrogenase type-2	211.74	128.42	125.64	90.74	98.02	94.96	155.267	94.5733	-0.715243	4.62e-06	3.82e-05
Glyoxylate cycle
BC1G_13616	BCIN_09g01320	ICL	Isocitrate lyase	111.04	129.21	121.86	111.44	121.92	120.47	120.703	117.943	-0.0333716	0.123401	0.236564
BC1G_09443	BCIN_09g06110	MLS	Malate synthase, glyoxysomal	255.61	259.91	269.6	260.12	280.87	285.76	261.707	275.583	0.074538	0.52374	0.680743
CoA biosynthesis
BC1G_01210	BCIN_06g01960	PANK	Pantothenate kinase	15.91	18.45	21.59	40.92	44.4	38.94	18.65	41.42	1.15115	4.46e-13	1.68e-11
BC1G_02344	BCIN_06g04980	PPCS	Phosphopantothenate--cysteine ligase CAB2	22.02	25.09	26.97	30.17	31.06	29.35	24.6933	30.1933	0.290108	0.242405	0.396126
BC1G_09191	BCIN_16g02860	DCAK	Dephospho-CoA kinase CAB5	22.72	21.34	16.2	18.88	24.32	18.8	20.0867	20.6667	0.0410675	0.530579	0.68641
Fatty acid biosynthesis
BC1G_14055	BCIN_01g00440	FASN	Fatty acid synthase subunit alpha	26.75	34.72	36.77	50.78	42.08	45.81	32.7467	46.2233	0.497273	0.0104651	0.0319979
BC1G_14051	BCIN_01g00450		Fatty acid synthase subunit beta	35.2	40.65	42.25	53.16	44.38	56.66	39.3667	51.4	0.384794	0.0677645	0.147898
BC1G_13188	BCIN_04g00210	MCAT	[acyl-carrier-protein] S-malonyltransferase	6.62	7.55	7.21	11.22	11.66	10.65	7.12667	11.1767	0.649191	0.00152986	0.00616934
Table S2.4.3. The genes involved in the ABA biosynthesis pathway were identified in B.cinerea TB-31 and Bcdim5-OE-X8.
B.cinerea B05.10 Gene ID		Protein name	Annotation
Old_locus_tag	New_locus_tag			TB-31-1_fpkm	TB-31-2_fpkm	TB-31-3_fpkm	Bcdim5-OE-X8-1_fpkm	Bcdim5-OE-X8-2_fpkm	Bcdim5-OE-X8-3_fpkm	TB-31_mean	Bcdim5-OE-X8_mean	log2(fc)	PValue	FDR
BC1G_02275	BCIN_06g05400	ACAT	Acetyl-CoA acetyltransferase	19.44	22.49	23.29	27.59	29.25	32.38	21.74	29.74	0.452053	0.0242085	0.0639922
BC1G_08841	BCIN_08g04860	AACS	Acetoacetyl-CoA synthetase	4.17	5.11	5.19	9.95	8.59	9.57	4.82333	9.37	0.958019	4.26e-07	4.52e-06
BC1G_02728	BCIN_07g02750		Acetoacetyl-CoA synthetase	7.05	10.97	12.55	15.34	18.8	16.78	10.19	16.9733	0.736116	0.000892566	0.00388127
BC1G_09652	BCIN_11g00330	HMGCS	Hydroxymethylglutaryl-CoA synthase	457.59	597.69	626.17	855.27	810.86	841.6	560.483	835.91	0.576676	0.000733323	0.00328776
BC1G_01518	BCIN_05g03150	HMGCR	3-hydroxy-3-methylglutaryl-coenzyme A reductase	285.9	347.12	336.93	370.74	312.06	352.16	323.317	344.987	0.0935927	0.704762	0.820543
BC1G_01429	BCIN_05g03770	MVK	Mevalonate kinase	64.85	80.2	77.2	113.5	110.07	98.28	74.0833	107.283	0.534205	0.0040063	0.0141525
BC1G_07491	BCIN_12g04570	PMVK	Probable phosphomevalonate kinase	37.81	51.13	49.66	47.22	44.31	49.74	46.2	47.09	0.0275279	0.402777	0.568963
BC1G_14194	BCIN_04g01890	MVD	Diphosphomevalonate decarboxylase	302.51	279.22	268.99	283.97	307.14	273.57	283.573	288.227	0.0234819	0.309364	0.472638
BC1G_11480	BCIN_12g01780	IDI	Isopentenyl-diphosphate Delta-isomerase	154.67	142.64	161.25	180.16	189.62	184.92	152.853	184.9	0.274597	0.269098	0.427795
BC1G_09058	BCIN_14g01170	GGS1	geranylgeranyl pyrophosphate synthase	44.5	45.18	44.6	37.22	39.4	39.26	44.76	38.6267	-0.212613	0.00299032	0.0110313
BC1G_02940	BCIN_15g03120	FPPS	Farnesyl pyrophosphate synthase	371.81	315.81	277.79	356	355.76	345.16	321.803	352.307	0.130653	0.891528	0.940377
BC1G_07529	BCIN_08g03830	ABA4	ABA4 protein	139.15	154.93	123.6	51.55	76.64	65.94	139.227	64.71	-1.10537	1.86e-15	1.08e-13
BC1G_07530	BCIN_08g03840	ABA2	cytochrome P450 monoxygenase	646.87	716.75	635.87	495.96	584.38	560.71	666.497	547.017	-0.285013	0.000316165	0.00158784
BC1G_07531	BCIN_08g03850	ABA1	cytochrome P450 monooxygenase	1853.98	1910.89	1462.67	973.66	1217.24	1176.07	1742.51	1122.32	-0.634681	7.15e-08	9.12e-07
BC1G_07534	BCIN_08g03880	ABA3	ABA3 protein	503.58	569.75	437.38	284.77	384.11	360.88	503.57	343.253	-0.552919	1.98e-06	1.8e-05

## Sheet: Table S2.5
Table S2.5.1. Key enzyme genes involved in secondary metabolic synthesis were identified in B. cinerea TB-31 and ΔBcdim5.
B.cinerea B05.10 Gene ID		Protein name
Old_locus_tag	New_locus_tag		TB-31-1_fpkm	TB-31-2_fpkm	TB-31-3_fpkm	ΔBcdim5-1_fpkm	ΔBcdim5-2_fpkm	ΔBcdim5-3_fpkm	TB-31_mean	ΔBcdim5_mean	log2(fc)	PValue	FDR
BC1G_16381	BCIN_12g06390	BcSTC1	383.01	465.69	354.9	65.84	60.78	53.66	401.2	60.0933	-2.73904	2.31e-94	1.98e-91
BC1G_09560	BCIN_08g02350	BcSTC2	1.55	1.03	1.43	1.31	2.09	1.99	1.33667	1.79667	0.426683	0.437124	0.578217
BC1G_06357	BCIN_13g05830	BcSTC3	5.74	5.95	6.59	1.22	1.35	0.94	6.09333	1.17	-2.38072	5.11e-27	8.38e-25
BC1G_14308	BCIN_04g03550	BcSTC4	75.41	124.96	106.78	226.25	209.33	220.59	102.383	218.723	1.09513	3.07e-09	4.2e-08
BC1G_10537	BCIN_01g03520	BcSTC5	2.52	13.11	3.26	14.93	10.94	11.03	6.29667	12.3	0.965998	0.272468	0.40638
BC1G_13295	BCIN_01g04920	BcDTC1	0.31	0.34	0.24	0.36	0.3	0.27	0.296667	0.31	0.0634254	0.84516	0.906237
BC1G_06751	BCIN_08g03560	BcDTC3	0.38	0.4	0.26	0.59	0.58	0.71	0.346667	0.626667	0.854149	0.0875349	0.165371
BC1G_01824	BCIN_05g05660	BcPAX1	0	0	0.21	0.06	0.05	0	0.07	0.0366667	-0.932886	0.671907	0.779158
BC1G_13907	BCIN_01g04550	BcPHS1	31.11	21.27	38.35	18.15	37.49	39.45	30.2433	31.6967	0.067714	0.788399	0.864511
BC1G_09042	BCIN_14g01290	BcPKS11	1.31	1.56	1.53	0.31	0.24	0.34	1.46667	0.296667	-2.30563	4.24e-29	7.48e-27
BC1G_08227	BCIN_16g01830	BcPKS14	0.95	1.26	1.26	2.43	2.69	2.08	1.15667	2.4	1.05306	8.83e-06	5.48e-05
BC1G_01752	BCIN_05g06220	BcPKS15	0.42	0.37	0.44	0.93	0.76	0.79	0.41	0.826667	1.01168	0.000932935	0.0033796
BC1G_10685	BCIN_16g05050	BcPKS16	1.35	0.29	0.83	0.92	1.58	1.45	0.823333	1.31667	0.677342	0.296492	0.432893
BC1G_10687	BCIN_16g05040		0.03	0.04	0.02	0.03	0.04	0.09	0.03	0.0533333	0.830075	0.483485	0.622039
BC1G_01954	BCIN_03g02000	BcPKS17	9.65	7.32	7.68	3.23	2.9	2.74	8.21667	2.95667	-1.47458	4.91e-12	1.14e-10
BC1G_16074	BCIN_08g00290	BcPKS19	4.75	6.25	6.58	3.14	3.25	3.33	5.86	3.24	-0.854907	2.87e-12	7e-11
BC1G_07030	BCIN_04g00640	BcPKS20	0.6	0.72	0.7	0.91	0.77	1.08	0.673333	0.92	0.450313	0.203583	0.323783
BC1G_13366	BCIN_14g00600	PKS1	0.3	0.43	0.38	1	1.04	1.12	0.37	1.05333	1.50936	1.06e-08	1.31e-07
BC1G_02586	BCIN_02g01680	PKS2	0.16	0.1	0.18	0.24	0.32	0.3	0.146667	0.286667	0.966833	0.0240606	0.056287
BC1G_02704	BCIN_07g02920	PKS8	13.89	17.57	15.1	25.3	26.17	31.15	15.52	27.54	0.8274	6.79e-07	5.58e-06
BC1G_15839	BCIN_01g00090	PKS9	114	114.94	119.83	120.11	129.82	133.45	116.257	127.793	0.136499	0.69859	0.799962
BC1G_04310	BCIN_13g01510	PKS10	0.46	0.45	0.48	1	1.01	0.92	0.463333	0.976667	1.07582	5.24e-05	0.000269132
BC1G_06876	BCIN_02g08770	PKS12	0.75	0.77	0.91	0.74	0.82	0.86	0.81	0.806667	-0.00594927	0.413821	0.556232
BC1G_14497	BCIN_03g08050	PKS13	40.94	73.27	65.28	78.66	80.21	87.45	59.83	82.1067	0.45663	0.0888403	0.167415
BC1G_06884	BCIN_02g08830	PKS18	0.94	1.61	1.42	2.12	2.1	2.6	1.32333	2.27333	0.780633	0.00214389	0.0070158
BC1G_13114	BCIN_05g08400	PKS21	5.12	4.53	5.35	0.07	0.12	0.08	5	0.09	-5.79586	5.13e-108	6.15e-105
BC1G_06032	BCIN_13g02130	CHS1	18.4	21.92	25.28	27.32	27.75	26.24	21.8667	27.1033	0.309737	0.303157	0.440906
BC1G_00695	BCIN_03g04360	BcPKS3	1.33	1.56	1.39	1.41	1.81	1.55	1.42667	1.59	0.156378	0.917205	0.948705
BC1G_04786	BCIN_11g02700	BcPKS4	2.41	3.2	2.66	2.57	2.13	1.99	2.75667	2.23	-0.305881	0.00462731	0.0137364
BC1G_15479	BCIN_01g11550	BcPKS5	1.71	1.87	1.85	2.31	2.4	1.72	1.81	2.14333	0.243867	0.658871	0.769438
BC1G_15702	BCIN_10g00040	BcPKS7	0	0.01	0.01	0	0	0	0.00666667	0.001	-2.73697	0.229404	0.355602
BC1G_16087	BCIN_01g00060	PKS6	88.13	115.09	112.24	108.95	118.02	113.29	105.153	113.42	0.10918	0.600317	0.723944
BC1G_15494	BCIN_01g11450	BcNRPS7	0.94	0.97	1.11	1.03	0.77	0.82	1.00667	0.873333	-0.204982	0.129626	0.226073
BC1G_04782	BCIN_11g02650	BcNRPS8	0.27	0.26	0.22	0.31	0.34	0.18	0.25	0.276667	0.146221	0.949079	0.966988
BC1G_09041	BCIN_14g01300	BcNRPS9	1.79	1.75	1.97	2.04	1.75	1.65	1.83667	1.81333	-0.0184457	0.18691	0.303178
BC1G_07441	BCIN_12g04980	NRPS1	0.43	0.59	0.77	0.65	0.77	0.68	0.596667	0.7	0.23043	0.822179	0.88979
BC1G_03511	BCIN_12g00690	NRPS2	2.54	2.52	2.94	3.33	3.75	4.35	2.66667	3.81	0.514753	0.0158527	0.0395724
BC1G_10928	BCIN_16g03570	NRPS3	0.88	1.4	1.48	1.37	1.41	1.58	1.25333	1.45333	0.213595	0.821627	0.889367
BC1G_02495	BCIN_02g02380	NRPS4	2.67	2.93	2.49	3.84	4.33	3.72	2.69667	3.96333	0.555537	0.00890558	0.0240647
BC1G_10622	BCIN_04g01390	NRPS5	1.33	1.33	1.04	0.95	1.12	0.89	1.23333	0.986667	-0.321928	0.0428845	0.0917035
BC1G_10567	BCIN_01g03730	NRPS6	1.54	1.59	1.33	1.66	1.85	1.18	1.48667	1.56333	0.0725442	0.631932	0.749923
BC1G_08209	BCIN_16g01940	DMATS1	0	0	0	0.03	0	0.14	0.001	0.0566667	5.82443	0.238022	0.366123
Table S2.5.2. Key enzyme genes involved in secondary metabolic synthesis were identified in B. cinerea TB-31 and ΔBchda1.
B.cinerea B05.10 Gene ID		Protein name
Old_locus_tag	New_locus_tag		TB-31-1_fpkm	TB-31-2_fpkm	TB-31-3_fpkm	ΔBchda1-1_fpkm	ΔBchda1-2_fpkm	ΔBchda1-3_fpkm	TB-31_mean	ΔBchda1_mean	log2(fc)	PValue	FDR
BC1G_16381	BCIN_12g06390	BcSTC1	383.01	465.69	354.9	370.48	446.32	367.6	401.2	394.8	-0.0231996	0.306663	0.460128
BC1G_09560	BCIN_08g02350	BcSTC2	1.55	1.03	1.43	2.3	1.8	1.79	1.33667	1.96333	0.554665	0.198245	0.332461
BC1G_06357	BCIN_13g05830	BcSTC3	5.74	5.95	6.59	3.66	3.1	4.56	6.09333	3.77333	-0.691392	6.12e-05	0.000382392
BC1G_14308	BCIN_04g03550	BcSTC4	75.41	124.96	106.78	127.29	104.96	106.96	102.383	113.07	0.143235	0.971007	0.983905
BC1G_10537	BCIN_01g03520	BcSTC5	2.52	13.11	3.26	11.72	9.17	10.03	6.29667	10.3067	0.710918	0.427596	0.585635
BC1G_13295	BCIN_01g04920	BcDTC1	0.31	0.34	0.24	0.36	0.33	0.27	0.296667	0.32	0.109229	0.94883	0.97153
BC1G_06751	BCIN_08g03560	BcDTC3	0.38	0.4	0.26	0.21	0.24	0.16	0.346667	0.203333	-0.769702	0.0653337	0.140039
BC1G_01824	BCIN_05g05660	BcPAX1	0	0	0.21	0	0.06	0	0.07	0.02	-1.80735	0.50947	0.660634
BC1G_13907	BCIN_01g04550	BcPHS1	31.11	21.27	38.35	33.19	21.26	28.73	30.2433	27.7267	-0.125343	0.215499	0.354162
BC1G_09042	BCIN_14g01290	BcPKS11	1.31	1.56	1.53	2.21	1.78	1.98	1.46667	1.99	0.440227	0.0951528	0.187829
BC1G_08227	BCIN_16g01830	BcPKS14	0.95	1.26	1.26	2.28	3.54	4.91	1.15667	3.57667	1.62864	8.1e-09	1.47e-07
BC1G_01752	BCIN_05g06220	BcPKS15	0.42	0.37	0.44	0.34	0.38	0.4	0.41	0.373333	-0.13516	0.331695	0.487136
BC1G_10685	BCIN_16g05050	BcPKS16	1.35	0.29	0.83	1.25	1.46	1.52	0.823333	1.41	0.776147	0.178352	0.306786
BC1G_10687	BCIN_16g05040		0.03	0.04	0.02	0.04	0.07	0.06	0.03	0.0566667	0.917538	0.398702	0.555909
BC1G_01954	BCIN_03g02000	BcPKS17	9.65	7.32	7.68	13.22	12.26	7.07	8.21667	10.85	0.40107	0.330196	0.485709
BC1G_16074	BCIN_08g00290	BcPKS19	4.75	6.25	6.58	7.15	6.65	9.05	5.86	7.61667	0.378259	0.157741	0.278692
BC1G_07030	BCIN_04g00640	BcPKS20	0.6	0.72	0.7	0.66	0.58	0.58	0.673333	0.606667	-0.150417	0.227177	0.368887
BC1G_13366	BCIN_14g00600	PKS1	0.3	0.43	0.38	0.28	0.27	0.34	0.37	0.296667	-0.318682	0.150002	0.268583
BC1G_02586	BCIN_02g01680	PKS2	0.16	0.1	0.18	0.14	0.14	0.12	0.146667	0.133333	-0.137504	0.459251	0.61583
BC1G_02704	BCIN_07g02920	PKS8	13.89	17.57	15.1	18.37	19.03	21.89	15.52	19.7633	0.348698	0.140198	0.254875
BC1G_15839	BCIN_01g00090	PKS9	114	114.94	119.83	122.29	148.1	215.96	116.257	162.117	0.479719	0.0681738	0.144806
BC1G_04310	BCIN_13g01510	PKS10	0.46	0.45	0.48	0.46	0.61	0.42	0.463333	0.496667	0.100227	0.906967	0.947445
BC1G_06876	BCIN_02g08770	PKS12	0.75	0.77	0.91	0.69	0.66	0.94	0.81	0.763333	-0.0856087	0.343655	0.49974
BC1G_14497	BCIN_03g08050	PKS13	40.94	73.27	65.28	61.8	57.09	90.64	59.83	69.8433	0.223253	0.707291	0.816509
BC1G_06884	BCIN_02g08830	PKS18	0.94	1.61	1.42	2.17	1.93	2.02	1.32333	2.04	0.624393	0.019972	0.0530227
BC1G_13114	BCIN_05g08400	PKS21	5.12	4.53	5.35	2.53	2.92	10.18	5	5.21	0.0593553	0.853888	0.917963
BC1G_06032	BCIN_13g02130	CHS1	18.4	21.92	25.28	27.76	26.92	28.97	21.8667	27.8833	0.35067	0.152046	0.271512
BC1G_00695	BCIN_03g04360	BcPKS3	1.33	1.56	1.39	1.67	1.74	2.19	1.42667	1.86667	0.387816	0.162753	0.285862
BC1G_04786	BCIN_11g02700	BcPKS4	2.41	3.2	2.66	1.91	2.42	2.41	2.75667	2.24667	-0.295139	0.0144966	0.0407428
BC1G_15479	BCIN_01g11550	BcPKS5	1.71	1.87	1.85	2.29	2.08	1.72	1.81	2.03	0.16549	0.879427	0.929759
BC1G_15702	BCIN_10g00040	BcPKS7	0	0.01	0.01	0.01	0.01	0.01	0.00666667	0.01	0.584963	0.715841	0.822812
BC1G_16087	BCIN_01g00060	PKS6	88.13	115.09	112.24	128.86	147.72	195.96	105.153	157.513	0.582979	0.00780166	0.0243031
BC1G_15494	BCIN_01g11450	BcNRPS7	0.94	0.97	1.11	1.05	1.12	0.94	1.00667	1.03667	0.042366	0.677393	0.794545
BC1G_04782	BCIN_11g02650	BcNRPS8	0.27	0.26	0.22	0.12	0.17	0.29	0.25	0.193333	-0.370838	0.257979	0.404609
BC1G_09041	BCIN_14g01300	BcNRPS9	1.79	1.75	1.97	2.69	2.66	1.99	1.83667	2.44667	0.413728	0.127121	0.235823
BC1G_07441	BCIN_12g04980	NRPS1	0.43	0.59	0.77	0.44	0.46	0.41	0.596667	0.436667	-0.450393	0.0759461	0.157436
BC1G_03511	BCIN_12g00690	NRPS2	2.54	2.52	2.94	4.31	4.05	4.38	2.66667	4.24667	0.671293	9.94e-05	0.000589819
BC1G_10928	BCIN_16g03570	NRPS3	0.88	1.4	1.48	1.33	1.53	1.83	1.25333	1.56333	0.318855	0.392213	0.549163
BC1G_02495	BCIN_02g02380	NRPS4	2.67	2.93	2.49	2.68	3.32	2.54	2.69667	2.84667	0.0780964	0.734051	0.834143
BC1G_10622	BCIN_04g01390	NRPS5	1.33	1.33	1.04	0.79	0.96	1.12	1.23333	0.956667	-0.366475	0.048591	0.110112
BC1G_10567	BCIN_01g03730	NRPS6	1.54	1.59	1.33	1.68	1.53	1.71	1.48667	1.64	0.141615	0.967016	0.981097
BC1G_08209	BCIN_16g01940	DMATS1	0	0	0	0.03	0	0.11	0.001	0.0466667	5.54432	0.316118	0.469961
Table S2.5.3. Key enzyme genes involved in secondary metabolic synthesis were identified in B. cinerea TB-31 and Bcdim5-OE-X8.
B.cinerea B05.10 Gene ID		Protein name
Old_locus_tag	New_locus_tag		TB-31-1_fpkm	TB-31-2_fpkm	TB-31-3_fpkm	Bcdim5-OE-X8-1_fpkm	Bcdim5-OE-X8-2_fpkm	Bcdim5-OE-X8-3_fpkm	TB-31_mean	Bcdim5-OE-X8_mean	log2(fc)	PValue	FDR
BC1G_16381	BCIN_12g06390	BcSTC1	383.01	465.69	354.9	420.66	410.31	363.61	401.2	398.193	-0.0108525	0.252746	0.40868
BC1G_09560	BCIN_08g02350	BcSTC2	1.55	1.03	1.43	2.2	1.82	1.21	1.33667	1.74333	0.383209	0.460464	0.623219
BC1G_06357	BCIN_13g05830	BcSTC3	5.74	5.95	6.59	5.2	5.77	5.26	6.09333	5.41	-0.171603	0.0792499	0.167067
BC1G_14308	BCIN_04g03550	BcSTC4	75.41	124.96	106.78	129.44	139.31	112.75	102.383	127.167	0.31274	0.285867	0.446871
BC1G_10537	BCIN_01g03520	BcSTC5	2.52	13.11	3.26	2.84	4.44	2.73	6.29667	3.33667	-0.916181	0.160914	0.289853
BC1G_13295	BCIN_01g04920	BcDTC1	0.31	0.34	0.24	0.43	0.34	0.17	0.296667	0.313333	0.0788554	0.924886	0.955627
BC1G_06751	BCIN_08g03560	BcDTC3	0.38	0.4	0.26	0.33	0.52	0.29	0.346667	0.38	0.13245	0.971263	0.982321
BC1G_01824	BCIN_05g05660	BcPAX1	0	0	0.21	0.05	0	0	0.07	0.0166667	-2.07039	0.435506	0.599615
BC1G_13907	BCIN_01g04550	BcPHS1	31.11	21.27	38.35	27.07	26.34	17.89	30.2433	23.7667	-0.347678	0.0147473	0.0427517
BC1G_09042	BCIN_14g01290	BcPKS11	1.31	1.56	1.53	1.34	1.4	1.4	1.46667	1.38	-0.0878728	0.17191	0.305575
BC1G_08227	BCIN_16g01830	BcPKS14	0.95	1.26	1.26	1.56	1.87	1.44	1.15667	1.62333	0.488986	0.09663	0.195098
BC1G_01752	BCIN_05g06220	BcPKS15	0.42	0.37	0.44	0.36	0.38	0.38	0.41	0.373333	-0.13516	0.345722	0.511987
BC1G_10685	BCIN_16g05050	BcPKS16	1.35	0.29	0.83	0.87	1.62	1.19	0.823333	1.22667	0.575195	0.346379	0.512296
BC1G_10687	BCIN_16g05040		0.03	0.04	0.02	0.03	0.09	0.01	0.03	0.0433333	0.530515	0.678663	0.800552
BC1G_01954	BCIN_03g02000	BcPKS17	9.65	7.32	7.68	5.3	6.22	5.95	8.21667	5.82333	-0.496708	0.00237238	0.00904097
BC1G_16074	BCIN_08g00290	BcPKS19	4.75	6.25	6.58	6.92	6.75	5.59	5.86	6.42	0.131673	0.95887	0.975038
BC1G_07030	BCIN_04g00640	BcPKS20	0.6	0.72	0.7	0.7	0.55	0.85	0.673333	0.7	0.056034	0.730153	0.833664
BC1G_13366	BCIN_14g00600	PKS1	0.3	0.43	0.38	0.45	0.37	0.41	0.37	0.41	0.148099	0.959358	0.975298
BC1G_02586	BCIN_02g01680	PKS2	0.16	0.1	0.18	0.18	0.26	0.2	0.146667	0.213333	0.540568	0.273107	0.432278
BC1G_02704	BCIN_07g02920	PKS8	13.89	17.57	15.1	27.07	25.19	27.79	15.52	26.6833	0.78181	6.64e-07	6.73e-06
BC1G_15839	BCIN_01g00090	PKS9	114	114.94	119.83	140.4	153.24	143.85	116.257	145.83	0.326974	0.094537	0.19155
BC1G_04310	BCIN_13g01510	PKS10	0.46	0.45	0.48	0.56	0.52	0.41	0.463333	0.496667	0.100227	0.896179	0.943127
BC1G_06876	BCIN_02g08770	PKS12	0.75	0.77	0.91	0.86	0.72	0.87	0.81	0.816667	0.0118254	0.562123	0.712074
BC1G_14497	BCIN_03g08050	PKS13	40.94	73.27	65.28	81.85	72.46	80.78	59.83	78.3633	0.38931	0.13796	0.257559
BC1G_06884	BCIN_02g08830	PKS18	0.94	1.61	1.42	1.85	1.58	2.08	1.32333	1.83667	0.472913	0.10178	0.203272
BC1G_13114	BCIN_05g08400	PKS21	5.12	4.53	5.35	4.81	7.2	5.53	5	5.84667	0.225686	0.624654	0.762103
BC1G_06032	BCIN_13g02130	CHS1	18.4	21.92	25.28	31.68	29.8	31.94	21.8667	31.14	0.510036	0.00798882	0.0254408
BC1G_00695	BCIN_03g04360	BcPKS3	1.33	1.56	1.39	1.39	1.4	1.74	1.42667	1.51	0.0819003	0.680263	0.801889
BC1G_04786	BCIN_11g02700	BcPKS4	2.41	3.2	2.66	2.54	2.25	2.45	2.75667	2.41333	-0.191898	0.0351877	0.0870506
BC1G_15479	BCIN_01g11550	BcPKS5	1.71	1.87	1.85	1.3	1.23	1.51	1.81	1.34667	-0.426597	0.000228594	0.00119727
BC1G_15702	BCIN_10g00040	BcPKS7	0	0.01	0.01	0	0.01	0	0.00666667	0.00333333	-1	0.471672	0.632431
BC1G_16087	BCIN_01g00060	PKS6	88.13	115.09	112.24	127.29	115.16	134.26	105.153	125.57	0.255997	0.37595	0.541919
BC1G_15494	BCIN_01g11450	BcNRPS7	0.94	0.97	1.11	0.84	0.9	1.09	1.00667	0.943333	-0.0937465	0.332608	0.498061
BC1G_04782	BCIN_11g02650	BcNRPS8	0.27	0.26	0.22	0.25	0.12	0.17	0.25	0.18	-0.473931	0.153763	0.280176
BC1G_09041	BCIN_14g01300	BcNRPS9	1.79	1.75	1.97	1.39	1.1	1.57	1.83667	1.35333	-0.440573	0.00047352	0.00226342
BC1G_07441	BCIN_12g04980	NRPS1	0.43	0.59	0.77	0.78	0.7	0.66	0.596667	0.713333	0.257651	0.673132	0.796613
BC1G_03511	BCIN_12g00690	NRPS2	2.54	2.52	2.94	3.83	3.22	4.76	2.66667	3.93667	0.561937	0.00947131	0.0294502
BC1G_10928	BCIN_16g03570	NRPS3	0.88	1.4	1.48	1.33	0.92	1.83	1.25333	1.36	0.117836	0.94827	0.968458
BC1G_02495	BCIN_02g02380	NRPS4	2.67	2.93	2.49	2.36	2.39	2.38	2.69667	2.37667	-0.182238	0.0300615	0.0766754
BC1G_10622	BCIN_04g01390	NRPS5	1.33	1.33	1.04	0.62	0.97	0.98	1.23333	0.856667	-0.525757	0.00999086	0.030818
BC1G_10567	BCIN_01g03730	NRPS6	1.54	1.59	1.33	1.35	1.65	1.9	1.48667	1.63333	0.135738	0.944499	0.966252
BC1G_08209	BCIN_16g01940	DMATS1	0	0	0	0	0	0.03	0.001	0.01	3.32193	0.912172	0.948432
Table S2.5.4. Key enzyme genes involved in secondary metabolic synthesis were identified in B. cinerea TB-31 and Bchda1-OE-X24.
B.cinerea B05.10 Gene ID		Protein name
Old_locus_tag	New_locus_tag		TB-31-1_fpkm	TB-31-2_fpkm	TB-31-3_fpkm	Bchda1-OE-X24-1_fpkm	Bchda1-OE-X24-2_fpkm	Bchda1-OE-X24-3_fpkm	TB-31_mean	Bchda1-OE-X24_mean	log2(fc)	PValue	FDR
BC1G_16381	BCIN_12g06390	BcSTC1	383.01	465.69	354.9	491.67	494.34	230.11	401.2	405.373	0.0149296	0.771816	0.875961
BC1G_09560	BCIN_08g02350	BcSTC2	1.55	1.03	1.43	1.81	1.59	1.93	1.33667	1.77667	0.410533	0.380545	0.584412
BC1G_06357	BCIN_13g05830	BcSTC3	5.74	5.95	6.59	6.97	8.84	11.08	6.09333	8.96333	0.556804	0.0798962	0.203802
BC1G_14308	BCIN_04g03550	BcSTC4	75.41	124.96	106.78	85.73	81.66	117.68	102.383	95.0233	-0.107627	0.384272	0.588854
BC1G_10537	BCIN_01g03520	BcSTC5	2.52	13.11	3.26	8.69	7.6	4.05	6.29667	6.78	0.106697	0.997692	0.999192
BC1G_13295	BCIN_01g04920	BcDTC1	0.31	0.34	0.24	0.45	0.15	0.15	0.296667	0.25	-0.246915	0.514054	0.699837
BC1G_06751	BCIN_08g03560	BcDTC3	0.38	0.4	0.26	0.28	0.18	0.23	0.346667	0.23	-0.591915	0.168922	0.340971
BC1G_01824	BCIN_05g05660	BcPAX1	0	0	0.21	0.11	0	0	0.07	0.0366667	-0.932886	0.685199	0.822897
BC1G_13907	BCIN_01g04550	BcPHS1	31.11	21.27	38.35	34.21	22.99	49.27	30.2433	35.49	0.230795	0.725415	0.844145
BC1G_09042	BCIN_14g01290	BcPKS11	1.31	1.56	1.53	2.61	2.71	4.02	1.46667	3.11333	1.08592	0.000101145	0.001507
BC1G_08227	BCIN_16g01830	BcPKS14	0.95	1.26	1.26	4.34	7.51	7.37	1.15667	6.40667	2.4696	3.52e-16	1.05e-13
BC1G_01752	BCIN_05g06220	BcPKS15	0.42	0.37	0.44	0.37	0.3	0.46	0.41	0.376667	-0.122336	0.453843	0.650734
BC1G_10685	BCIN_16g05050	BcPKS16	1.35	0.29	0.83	0.64	1.18	1.54	0.823333	1.12	0.44395	0.554703	0.73256
BC1G_10687	BCIN_16g05040		0.03	0.04	0.02	0.02	0.06	0.05	0.03	0.0433333	0.530515	0.602316	0.766214
BC1G_01954	BCIN_03g02000	BcPKS17	9.65	7.32	7.68	13.16	7.46	3.98	8.21667	8.2	-0.00292933	0.759354	0.867399
BC1G_16074	BCIN_08g00290	BcPKS19	4.75	6.25	6.58	10.08	12.78	11.88	5.86	11.58	0.982663	8.01e-05	0.00124803
BC1G_07030	BCIN_04g00640	BcPKS20	0.6	0.72	0.7	0.45	0.6	0.52	0.673333	0.523333	-0.363591	0.0998388	0.237678
BC1G_13366	BCIN_14g00600	PKS1	0.3	0.43	0.38	0.32	0.45	0.39	0.37	0.386667	0.0635651	0.906036	0.951243
BC1G_02586	BCIN_02g01680	PKS2	0.16	0.1	0.18	0.26	0.16	0.19	0.146667	0.203333	0.471306	0.420775	0.621935
BC1G_02704	BCIN_07g02920	PKS8	13.89	17.57	15.1	9.83	16.76	18.56	15.52	15.05	-0.0443651	0.575402	0.748035
BC1G_15839	BCIN_01g00090	PKS9	114	114.94	119.83	184.9	323.49	319.31	116.257	275.9	1.24683	1.28e-05	0.00029647
BC1G_04310	BCIN_13g01510	PKS10	0.46	0.45	0.48	0.56	0.69	0.48	0.463333	0.576667	0.315687	0.485278	0.678055
BC1G_06876	BCIN_02g08770	PKS12	0.75	0.77	0.91	1.48	1.32	1.2	0.81	1.33333	0.719044	0.0143873	0.060126
BC1G_14497	BCIN_03g08050	PKS13	40.94	73.27	65.28	58.04	109.09	162.17	59.83	109.767	0.875499	0.0298254	0.102207
BC1G_06884	BCIN_02g08830	PKS18	0.94	1.61	1.42	1.33	1.35	1.43	1.32333	1.37	0.0499994	0.829068	0.910858
BC1G_13114	BCIN_05g08400	PKS21	5.12	4.53	5.35	10.06	12.96	8.87	5	10.63	1.08814	3.66e-05	0.000676794
BC1G_06032	BCIN_13g02130	CHS1	18.4	21.92	25.28	27.34	21.94	35.73	21.8667	28.3367	0.373937	0.280165	0.480524
BC1G_00695	BCIN_03g04360	BcPKS3	1.33	1.56	1.39	1.73	2.34	2.25	1.42667	2.10667	0.562314	0.0511152	0.148123
BC1G_04786	BCIN_11g02700	BcPKS4	2.41	3.2	2.66	2.36	2.94	2.46	2.75667	2.58667	-0.0918307	0.391813	0.595923
BC1G_15479	BCIN_01g11550	BcPKS5	1.71	1.87	1.85	1.24	1.98	1.36	1.81	1.52667	-0.245605	0.180219	0.356499
BC1G_15702	BCIN_10g00040	BcPKS7	0	0.01	0.01	0.01	0	0	0.00666667	0.00333333	-1	0.810377	0.898704
BC1G_16087	BCIN_01g00060	PKS6	88.13	115.09	112.24	159.79	282.04	268.02	105.153	236.617	1.17006	6.78e-05	0.00109659
BC1G_15494	BCIN_01g11450	BcNRPS7	0.94	0.97	1.11	0.75	0.96	0.69	1.00667	0.8	-0.331514	0.139903	0.299856
BC1G_04782	BCIN_11g02650	BcNRPS8	0.27	0.26	0.22	0.3	0.52	0.43	0.25	0.416667	0.736966	0.150955	0.315533
BC1G_09041	BCIN_14g01300	BcNRPS9	1.79	1.75	1.97	1.42	1.25	1.12	1.83667	1.26333	-0.539854	0.00205119	0.0144547
BC1G_07441	BCIN_12g04980	NRPS1	0.43	0.59	0.77	0.63	0.76	0.66	0.596667	0.683333	0.195664	0.780004	0.880257
BC1G_03511	BCIN_12g00690	NRPS2	2.54	2.52	2.94	2.04	2.72	3.87	2.66667	2.87667	0.109361	0.98853	0.994416
BC1G_10928	BCIN_16g03570	NRPS3	0.88	1.4	1.48	1.21	2.06	2.03	1.25333	1.76667	0.49526	0.186537	0.364312
BC1G_02495	BCIN_02g02380	NRPS4	2.67	2.93	2.49	2.14	2.58	1.59	2.69667	2.10333	-0.3585	0.0772094	0.199408
BC1G_10622	BCIN_04g01390	NRPS5	1.33	1.33	1.04	0.82	0.76	0.5	1.23333	0.693333	-0.830942	0.00365125	0.0219546
BC1G_10567	BCIN_01g03730	NRPS6	1.54	1.59	1.33	1.13	1.72	1.43	1.48667	1.42667	-0.0594329	0.536377	0.717582
BC1G_08209	BCIN_16g01940	DMATS1	0	0	0	0.03	0.05	0.02	0.001	0.0333333	5.05889	0.364488	0.567928
